# 1                    **Molecular Mechanism for Rotational Switching**

## 2                    **of the Bacterial Flagellar Motor**

3

4    *Yunjie Chang*<sup>1,2,#</sup>, *Kai Zhang*<sup>3,#</sup>, *Brittany L. Carroll*<sup>1,2</sup>, *Xiaowei Zhao*<sup>4,7</sup>, *Nyles W. Charon*<sup>6</sup>,  
5    *Steven J. Norris*<sup>4</sup>, *Md A Motaleb*<sup>5</sup>, *Chunhao Li*<sup>3,§</sup>, *Jun Liu*<sup>1,2, §</sup>

6    *1. Department of Microbial Pathogenesis, Yale University School of Medicine, New Haven,*  
7    *CT 06516, USA*

8    *2. Microbial Sciences Institute, Yale University, West Haven, CT 06536, USA*

9    *3. Philips Institute for Oral Health Research, Virginia Commonwealth University, Richmond,*  
10    *VA 23298, USA*

11    *4. Department of Pathology and Laboratory Medicine, University of Texas Health Science*  
12    *Center, Houston, TX 77030, USA*

13    *5. Department of Microbiology and Immunology, Brody School of Medicine, East Carolina*  
14    *University, Greenville, NC 27834, USA*

15    *6. Department of Microbiology, Immunology, and Cell Biology, Robert C. Byrd Health*  
16    *Sciences Center, West Virginia University, Morgantown, WV 26506, USA*

17    *7. Current address: Howard Hughes Medical Institute, Janelia Research Campus, Ashburn,*  
18    *VA 20147, USA*

19    #Both authors contributed equally to this work.

20    §Corresponding authors: [jliu@yale.edu](mailto:jliu@yale.edu); [cli5@vcu.edu](mailto:cli5@vcu.edu)

21    Running title: In situ structures of the flagellar motor in CW and CCW rotations

22    Keywords: rotary motor, switch complex, supramolecular complex, FliG, CheY

23 **Abstract**

24 The bacterial flagellar motor is a remarkable nanomachine that can rapidly rotate in both  
25 counter-clockwise (CCW) and clockwise (CW) senses. The transitions between CCW and CW  
26 rotation are critical for chemotaxis, and they are controlled by a signaling protein (CheY-P)  
27 that interacts with a switch complex at the cytoplasmic side of the flagellar motor. However,  
28 the exact molecular mechanism by which CheY-P controls the motor rotational switch remains  
29 enigmatic. Here, we use the Lyme disease spirochete, *Borrelia burgdorferi*, as the model  
30 system to dissect the mechanism underlying flagellar rotational switching. We first determined  
31 high resolution *in situ* motor structures in the *cheX* and *cheY3* mutants in which motors are  
32 genetically locked in CCW or CW rotation. The structures showed that the CheY3 protein of  
33 *B. burgdorferi* interacts directly with the FliM protein of the switch complex in a  
34 phosphorylation-dependent manner. The binding of CheY3-P to FliM induces a major  
35 remodeling of the switch protein FliG2 that alters its interaction with the torque generator.  
36 Because the remodeling of FliG2 is directly correlated with the rotational direction, our data  
37 lead to a model for flagellar function in which the torque generator rotates in response to an  
38 inward flow of H<sup>+</sup> driven by the proton motive force. Rapid conformational changes of FliG2  
39 allow the switch complex to interact with opposite sides of the rotating torque generator,  
40 thereby facilitating rotational switching between CW and CCW.

## 41 **Introduction**

42 The bacterial flagellum is a remarkable nanomachine that can rotate in both the counter-  
43 clockwise (CCW) and clockwise (CW) directions and can switch rapidly between the two  
44 rotational states<sup>1-4</sup>. Regulation of the rotational direction is key for bacterial chemotaxis, a  
45 behavior that enables the cells to move toward attractants or away from repellents<sup>5,6</sup>.  
46 In externally flagellated bacteria, such as *Escherichia coli* and *Salmonella enterica* serovar  
47 Typhimurium, CCW rotation of the flagella coalesces the external helical flagellar filaments  
48 into a bundle that produces smooth swimming (a run), and CW rotation disrupts the bundle  
49 and reorients the cell (a tumble)(Extended Data Fig. 1a, b)<sup>1</sup>. A sophisticated chemotaxis  
50 signaling system allows the cell to sense chemical stimuli and transmit this information via a  
51 phosphorylated form of the response regulator CheY to regulate the direction of rotation<sup>5,6</sup>.  
52 Although it is well known that lower levels of CheY-P promote CCW rotation and higher levels  
53 promote CW rotation, the exact mechanism of CheY-P induced rotational switching is  
54 unknown<sup>1,3,4</sup>. Intriguingly, recent data suggest that flagellar switch proteins are highly dynamic  
55 and that the number of subunits vary significantly in *E. coli* and *S. enterica* motors rotating  
56 CCW and CW<sup>7,8</sup>. However, it is unclear how the flagella could accommodate such large  
57 changes while still maintaining rapid rotation and switching.

58 Spirochetes are a unique group of bacteria with distinct morphology and motility<sup>9,10</sup>.  
59 Spirochetes possess multiple internal periplasmic flagella (PF) that are attached near each cell  
60 pole. These flagella are located between the outer membrane sheath and the cell cylinder, and  
61 their rotation causes the entire cell body to rotate (Extended Data Fig. 1e, f)<sup>9</sup>. Spirochetes run  
62 when the anterior flagella rotate CCW and the posterior flagella rotate CW<sup>11,12</sup>. When the  
63 flagella at both poles rotate in the same direction, the spirochetes flex in place and fail to move  
64 translationally<sup>11,12</sup>. To swim toward an attractant, spirochetes have evolved a complex  
65 chemotaxis and motility system to coordinate rotation of the PF at the two cell poles<sup>9,13</sup>. CheY3

66 is a key response regulator that is essential for chemotaxis in *B. burgdorferi*;  $\Delta cheY3$  mutant  
67 cells are non-chemotactic and constantly run<sup>12</sup>. CheX is the CheY-P phosphatase identified in  
68 *B. burgdorferi*<sup>14</sup>. A  $\Delta cheX$  mutant constantly flexes and is not able to run or reverse *in vitro*<sup>14</sup>.  
69 How the CheY3-P coordinates flagellar rotation at both poles to achieve directional migration  
70 in chemical gradients is a key question in spirochete motility and chemotaxis<sup>9,10</sup>.

71 The rotary motor is the most intricate part of the flagellum; it is responsible for flagellar  
72 assembly, rotation and directional switching. Whereas details of the motor structures vary  
73 among species, the core components, which are the products of billions of years of evolution,  
74 are highly conserved<sup>15,16</sup>. The membrane-bound stator and the switch complex (also called C-  
75 ring) are directly responsible for flagellar rotation and switching. The stator complex is the  
76 torque generator powered by ion flux across the membrane. It is composed of two  
77 transmembrane proteins, called MotA and MotB in *E. coli* and *B. burgdorferi*<sup>17,18</sup>. MotA has a  
78 large cytoplasmic domain, which contains several conserved charged residues that are critical  
79 for the interaction with the switch complex<sup>19</sup>. MotB has a large periplasmic domain that is  
80 believed to bind to the peptidoglycan layer<sup>20,21</sup>. The switch complex is comprised of three  
81 proteins (FliG, FliM, and FliN) that assemble to form the characteristic C-ring at the  
82 cytoplasmic side of the motor. FliG is the protein most directly involved in interacting with the  
83 stator to generate torque<sup>22</sup>. In *B. burgdorferi*, which has two FliG proteins, FliG2 is present in  
84 the C-ring and plays a similar role as its counterpart in other bacteria. FliG1 is located at one  
85 cell pole; it remains unknown if it is a part of the C-ring<sup>23</sup>. FliM and FliN are extensively  
86 involved in switching the direction of the motor<sup>3</sup>.

87 Here, we deployed cryo-electron tomography (cryoET) to visualize the *B. burgdorferi*  
88 motors in  $\Delta cheX$  and  $\Delta cheY3$  mutants in which the flagella are locked in CCW and/or CW  
89 rotation. The resulting *in situ* structures of the stator complex and switch complex enable us to  
90 uncover that binding of CheY3-P to FliM induces a profound conformational change in FliG2

91 between CW and CCW rotation. Importantly, our data suggest a model in which the stator  
92 complexes rotate in response to proton flow and interact with FliG2 that are in radically  
93 different conformations to drive CW and CCW rotation.

94

## 95 **Results**

### 96 ***In situ* structure of the flagellar motor in constantly flexing $\Delta cheX$ cells**

97 Recent *in situ* structural analysis of the wild-type (WT) and  $\Delta motB$  flagellar motors in *B.*  
98 *burgdorferi* demonstrates the utility of combining cryoET and genetic approaches for  
99 understanding the structure and function of the intact *B. burgdorferi* flagellar motor<sup>18</sup>. In an  
100 unsynchronized pool of WT cells, the motors constantly change their rotational senses to drive  
101 the spirochetal motility. Therefore, it is challenging to sort out the WT motors into distinct CW  
102 or CCW conformations. To overcome this problem, we analyzed the flagellar motors in  $\Delta cheX$   
103 mutant cells which continuously flex and unable to run or reverse *in vitro*<sup>14</sup> (Supplementary  
104 Video 1). Due to high levels of CheY3-P in the  $\Delta cheX$  cells<sup>14</sup>, the motors in both cell tips are  
105 expected to be locked in CW rotation. Another advantage of analyzing the motors of these cells  
106 is that due to high levels of CheY3-P it may be possible to visualize the switch complex when  
107 it is occupied by this signaling protein.

108 To determine the *in situ* flagellar motor structure by cryoET and subtomogram averaging,  
109 we analyzed 1,056 flagellar motors from 246 tomograms of  $\Delta cheX$  cell poles (Extended Data  
110 Fig. 2a, Extended Data Table 1). The averaged structure reveals the core components of the  
111 flagellar motor – such as the stator, C-ring, export apparatus, and spirochete-specific collar<sup>18</sup>  
112 (Fig. 1a). A *B. burgdorferi* flagellar motor has 16 stator complexes, which form a large ring  
113 with 62 nm in diameter (Fig. 1a, b). Each stator complex includes a small, 8 nm ring within  
114 the cytoplasmic membrane (Fig. 1a, b). Improved resolution of the C-ring structure, obtained

115 after focused refinement (Fig. 1c and Extended Data Fig. 3) shows 46-fold symmetry,  
116 consistent with that observed in the WT flagellar motors<sup>18</sup>.

117 To further resolve detailed interaction between the C-ring and the stator complex, we  
118 applied symmetry expansion and utilized focused classification and alignment of the stator-  
119 rotor interaction region (dash framed region in Fig. 1a). The transmembrane and cytoplasmic  
120 portions of the stator complex have a bell-shaped structure embedded in the cytoplasmic  
121 membrane (Fig. 1d-g, Supplementary Video 2). It is 9 nm in height and 8 nm in diameter,  
122 which are similar to the dimensions of the purified MotA complex from *Aquafex aeolicus*<sup>24</sup>  
123 (Extended Data Fig. 4). The periplasmic domain of the stator complex is inserted into the collar  
124 (Fig. 1d-g). It is ~9 nm long, and the top portion of its density corresponds well to the crystal  
125 structure of the *S. enterica* MotB periplasmic domain<sup>25</sup> (Extended Data Fig. 4).

126 The C-ring exhibits a “Y” shape in the refined structure (Fig. 1d, e), which is similar to  
127 the previously reported *in vitro* C-ring structure in *S. enterica*<sup>26</sup>. However, the bottom portion  
128 of the C-ring in our structure is a spiral in which adjacent subunits are connected to one another.  
129 The top portion of the C-ring interacts with the periphery of the stator cytoplasmic region. By  
130 assembling the collar, stator complexes, and C-ring together, we revealed a complex  
131 architecture of the CW-rotating flagellar motor with unprecedented details (Fig. 1h, i).

132

### 133 **CheY3-P binds to the FliM protein of the C-ring**

134 The well-defined C-ring in the  $\Delta cheX$  mutant was found to be associated with two previously  
135 unidentified densities (arrowheads indicated in Fig. 1d, e). We hypothesized that these  
136 densities represent bound CheY3-P, as high levels of CheY3-P are expected in the  $\Delta cheX$   
137 cells<sup>14</sup>. To characterize CheY3-P and its interaction with the  $\Delta cheX$  motor, we replaced the  
138 *cheX-cheY3* genes with *cheY3-gfp*, generating a *cheX::cheY3-GFP* mutant (Extended Data Fig.

139 5). Like  $\Delta cheX$ , the GFP-labeled mutant constantly flexes. In addition, the mutant cells have  
140 fluorescent puncta at both cell poles (Fig. 2a), indicating that CheY3-P co-localizes with the  
141 flagellar motors. To confirm CheY3-P binding on the switch complex, we co-expressed His-  
142 CheY3 and FliM-FLAG in *E. coli* and affinity purified His-CheY3 and bound proteins by Ni-  
143 NTA binding in the presence or absence of acetyl phosphate (final concentration 40 mM). The  
144 purified products were examined using Western blots probed against anti-His or anti-FLAG  
145 antibodies. The His-CheY3\* protein, in which Asp79 was converted to Ala, was used as a  
146 control, as it cannot be phosphorylated. In the presence of acetyl phosphate, FliM-FLAG co-  
147 purified with His-CheY3, but not with His-CheY3\* (Fig. 2e, Extended Data Fig. 6). In the  
148 absence of acetyl phosphate, and therefore at low levels of CheY3-P, only a small amount of  
149 FliM-FLAG co-purified with His-CheY3. In contrast to FliM, no FliN-FLAG co-purified with  
150 His-CheY3, even in the presence of acetyl phosphate (Fig. 2f). These results indicate that  
151 CheY3 binds to FliM in a phosphorylation-dependent manner.

152 To resolve the CheY3-P densities on the switch complex, we determined *in situ* structure  
153 of the motors in the *cheX::cheY3-GFP* mutant by cryoET and subtomogram averaging.  
154 Compared to the motor structure in the  $\Delta cheX$  mutant, the motor structure in *cheX::cheY3-*  
155 *GFP* cells has an extra ring, likely contributed by GFP fused to CheY3 (green arrowhead in  
156 Fig. 2c). Together with the above biochemical data, we conclude that CheY3-P interacts with  
157 the FliM protein on the exterior side of the C-ring (Fig. 2c, d).

158

### 159 **Distinct conformations of the switch complex in the absence of CheY3-P**

160 To compare the switch complex bound by CheY3-P with that in the absence of CheY3-P, we  
161 analyzed the motor structures in  $\Delta cheY3$  mutant cells, which continuously run and cannot flex  
162 or reverse<sup>27</sup> (Extended Data Table 1, Extended Data Fig. 2b, Supplementary Video 3). The

163 overall *in situ* motor structure in the  $\Delta cheY3$  mutant (Extended Data Fig. 7a, b) is quite similar  
164 to the averaged structure in the  $\Delta cheX$  motor (Fig. 1a, b). Importantly, the stator ring is almost  
165 identical with 62nm in diameter. However, focused classification and alignment of the C-ring  
166 in the  $\Delta cheY3$  motors revealed two distinct conformations of the C-ring:  $\Delta cheY3$ -Class-1 (Fig.  
167 3a-e, Extended Data Fig. 7e-h, Supplementary Video 4) and  $\Delta cheY3$ -Class-2 (Fig. 3f-j,  
168 Extended Data Fig. 7i-l, Supplementary Video 5), although they share the same 46-fold  
169 symmetry and exhibit a “Y” shape structure. The C-ring conformation of  $\Delta cheY3$ -Class-1  
170 motors (Fig. 3a-e, Extended Data Fig. 7h) is similar to that in the  $\Delta cheX$  motor (Fig. 1d-g,  
171 Extended Data Fig. 3c), while the CheY3-P density is absent. In contrast, the C-ring in  $\Delta cheY3$ -  
172 Class-2 (Fig. 3f-j, Extended Data Fig. 7i) is twisted in a different direction compared to that in  
173  $\Delta cheY3$ -Class-1 (Fig. 3a-e, Extended Data Fig. 7h) or the  $\Delta cheX$  motor (Fig. 1d-g, Extended  
174 Data Fig. 3c), resulting in different interactions between the stator and the C-ring. Specifically,  
175 the top portion of the C-ring in the Class-1 motor interacts with the outer part of the stator  
176 complex (Fig. 3a, b), which is the same as in the  $\Delta cheX$  motor (Fig. 1d, e). In contrast, the top  
177 portion of the C-ring in the Class-2 motor interacts with the inner part of the stator complex  
178 (Fig. 3f, g). Therefore, our results suggest that the flagellar rotation direction is correlated with  
179 distinct stator-rotor interactions. As the  $\Delta cheY3$  cells run constantly, we hypothesize that the  
180  $\Delta cheY3$ -Class-1 motors rotate CW near one pole, whereas the  $\Delta cheY3$ -Class-2 motors rotate  
181 CCW near another pole. To test the model, we analyzed the motors at both poles in the same  
182  $\Delta cheY3$  cells. Our data confirmed that the motors near one pole indeed rotate CCW, while the  
183 motors near another pole in the same cell rotate CW (Extended Data Fig. 8).

184

### 185 **CheY3-P binding triggers major remodeling of FliG2**

186 To understand molecular details of the distinct C-ring conformations in the CW and CCW  
187 motors, we modeled the switch complex in the absence and presence of CheY3-P based on our



188 cryoET maps and crystal structures of key flagellar components previously solved (see  
189 Methods). The resulting C-ring models fit well into our density maps (Fig. 4b, f). FliG2, a  
190 three-domain protein, forms the “v” at the top of the C-ring, poised to interact with the MS-  
191 ring via the N-terminal domain (FliG2<sub>N</sub>), and the stator complex via the C-terminal domain  
192 (FliG2<sub>C</sub>). The middle domain of FliG2 (FliG2<sub>M</sub>) interacts with the middle domain of FliM  
193 (FliM<sub>M</sub>), forming the stalk of the C-ring subunit. The C-terminal domain of FliM (FliM<sub>C</sub>) forms  
194 a heterodimer with FliN. A spiral is created at the base of the C-ring by alternating FliM<sub>C</sub>-FliN  
195 heterodimers and FliN-FliN homodimers (Fig. 4c, d), in which FliG2:FliM:FliN exist in a 1:1:3  
196 stoichiometry as proposed previously<sup>28,29</sup>. The switch complex seen in the  $\Delta cheY3$ -Class-2  
197 motor represents the conformation associated with the CCW rotational state (Fig. 4a-d).

198 The switch complex of the  $\Delta cheX$  motor is locked in the CW rotational state. When  
199 CheY3-P binds, the N-terminal domain of FliM (FliM<sub>N</sub>) interacts with CheY3-P, and this  
200 interaction results in an  $\sim 27^\circ$  tilt of the FliM<sub>M</sub> (Extended Data Fig. 9b). Importantly, although  
201 the spiral ring structure at the base of the C-ring remains almost the same, FliG2 undergoes a  
202 major remodeling in the  $\Delta cheX$  motor (Fig. 4e, f) compared to that in  $\Delta cheY3$ -Class-2 motor  
203 (Fig. 4a, b). The conformational change in FliG2 significantly enlarges the FliG2 ring from 55  
204 nm to 62 nm, allowing FliG2 to interact with distinct parts of the stator ring (Fig. 4c, g,  
205 Extended Data Fig. 10).

206

## 207 Discussion

208 Spirochetes have evolved a unique strategy to control motility<sup>9,10</sup>. However, it is still not clear  
209 how the WT spirochete produces asymmetric flagellar rotation. It is even more mysterious that  
210 asymmetric rotation persists in the complete absence of CheY3. In the constantly running  
211  $\Delta cheY3$  cells, we found two distinct conformations of the switch complex, consistent with the  
212 notion that they are in CW and CCW rotational states to keep the cell running (Extended Data

213 Fig. 11). Comparison of the CW and CCW conformations in opposite poles of the constantly  
214 running  $\Delta cheY3$  cells (Fig. 3b, g, Extended Data Fig. 8) reveals additional structure (colored  
215 in grey) associated with the C-ring in the CW conformation, suggesting that the additional  
216 structure likely plays a role in the asymmetric flagellar rotation in spirochete. As the extra  
217 structure and CheY3-P bind to FliM from two opposite sides of the C-ring, they may play  
218 similar roles in triggering the conformational change of FliG2 to allow CW rotation. The  
219 identity of the additional density is presently unknown. FliG1 is one possible candidate. It has  
220 been demonstrated previously that FliG2 is associated with the flagellar motors at both cell  
221 ends, whereas FliG1 is present at only one of the poles<sup>23</sup>.  $\Delta fliG2$  cells are aflagellar and  
222 nonmotile, whereas  $\Delta fliG1$  cells are flagellated, but have deficient motility in which the flagella  
223 at one cell pole appear to be ‘paralyzed’<sup>23</sup>. One possibility is that association of FliG1 with  
224 flagellar motors at one pole alters their ‘default’ structure and rotational direction, and their  
225 responses to regulatory elements such as CheY3-P. In addition, a double mutant lacking  
226 phosphodiesterases PdeA and PdeB has been shown to have a constantly flexing phenotype<sup>30</sup>,  
227 suggesting that these proteins might be also involved in regulating the asymmetric rotation.  
228 Further research is clearly required to clarify this issue.

229 Comparison of the CW motor in  $\Delta cheX$  cells with the CCW  $\Delta cheY3$ -Class-2 motor  
230 provides direct evidence for a profound conformational change in the C-ring caused by CheY3-  
231 P binding to FliM. The diameter of the FliG2 ring expands from 55 nm to 62 nm upon binding  
232 of CheY3-P, whereas the diameter of the bottom portion of the C-ring remains similar  
233 (Extended Data Fig. 10). Importantly, the *B. burgdorferi* C-ring in both CCW and CW rotations  
234 possesses 46-fold symmetry, with each unit composed of FliG2, FliM, and FliN (1:1:3). In  
235 each subunit, one FliM and three FliN proteins form the base in a spiral shape, and one FliG2  
236 stacks on FliM. The dramatic conformational changes in FliG2 are accommodated by the  
237 flexibility of the helical linker between the FliG2<sub>MC</sub> domains<sup>31-33</sup>. This helix contains a highly

238 conserved Gly-Gly residue pair located near the C-terminus of the helix<sup>32,34,35</sup>. The large  
239 rearrangement of FliG2 during directional switching allows it to engage different parts of the  
240 stator complex in the CW and CCW conformations.

241 The stator complex is known to be highly dynamic in many bacterial species<sup>25,36</sup>. As a  
242 result, it has been very challenging to visualize the stator complex in the intact motor at high  
243 resolution<sup>15,16,18</sup>. Here, we used cryoET and focused refinement to visualize the bell-shaped  
244 structure of the stator complex in both the CW and CCW rotational states. This finding is of  
245 particular importance, because it allows us to understand how the stator complex interacts with  
246 the switch complex at the molecular level. Sixteen bell-shaped stator complexes form a stator  
247 ring of 62 nm in diameter. In CW rotation, FliG2<sub>C</sub> interacts with the outer part of the stator  
248 ring, while during CCW rotation it interacts with the inner part of the stator ring. This  
249 association suggests that the outer part of stator cytoplasmic region drives the C-ring CW,  
250 while the inner part drives the C-ring CCW. This result is consistent with the notion that the  
251 inward flow of protons drives the unidirectional rotation of the MotA portion of the stator.  
252 Based on these predictions, we propose a novel model for the generation of flagellar rotation  
253 and for the switching of rotational directions (Fig. 5, Supplementary Video 6).

254 When protons flow inward through the stator ion channel, we postulate that the  
255 cytoplasmic region of the stator rotates CW (viewing from MotB through the membrane to  
256 MotA). In the default state (without CheY3-P) FliG2 interacts with the inner part of the stator  
257 cytoplasmic region and the C-ring rotates CCW (Fig. 5a, b). When CheY3-P binds to FliM  
258 from the exterior side of the C-ring (Fig. 5f, g), FliG2 undergoes a major remodeling to interact  
259 the outer part of the stator (Fig. 5f, g). The interaction with the CW-rotating stator would then  
260 drive CW rotation of the C-ring (Fig. 5e). As FliM and FliN form a stable spiral ring at the  
261 base of the C-ring (Fig. 5d, h), the CheY3-P mediated conformational changes of FliG2 allow  
262 rapid rotational switching. Given that the C-ring and stator are evolutionarily conserved, this

263 molecular mechanism for flagellar rotational switching may be utilized, with some  
264 modifications, across a wide spectrum of bacterial species.

265 Many challenges remain to test this model. The most obvious one is to directly  
266 demonstrate that the cytoplasmic domains of the stator units actually rotate, although a recent  
267 study on Tom complex, a homologous complex of the stator complex, suggested that it may  
268 form a pentamer and rotate in presence of the proton motive force<sup>37</sup>. Each stator unit contains  
269 a central MotB dimer and four to five peripheral MotA subunits. MotB is stationary; in *B.*  
270 *burgdorferi* it is embedded in the collar and firmly attached to the peptidoglycan of the cell  
271 wall. The critical conserved Asp residue required for proton conduction is on the single  
272 transmembrane helix of MotB<sup>17</sup>. The model predicts that the MotA subunits rotate around  
273 MotB in a manner that is coupled to the inward flow of protons, resulting in sequential  
274 interactions of the MotA subunits with consecutive FliG2 units in the C-ring (Fig. 5). It must  
275 be remembered that the transmembrane helices of MotA and MotB are close together at the  
276 base of the splayed bell-shaped structure of the stator cytoplasmic domain.

277 In summary, we determined the structures of CW- and CCW-rotating flagellar motors in  
278 *B. burgdorferi* by cryoET and subtomogram averaging. We demonstrated that the flagellar  
279 switch complexes undergo substantial remodeling to form distinct interactions with the stator  
280 complexes during the rotational switching, analogous to throwing an automobile transmission  
281 into reverse. We propose a novel model for the generation of torque and the switching of  
282 rotational direction. A proton flux through the stator causes the bell-shaped MotA cytoplasmic  
283 region to rotate CW (view from the hook to the C-ring). Interactions with the outer part of the  
284 stator cytoplasmic region cause the C-ring to rotate CW, and interactions with the inner part of  
285 the stator cytoplasmic region cause the C-ring to rotate CCW. Control of the direction of  
286 flagellar rotation consists of aligning the interaction sites of the stator and the switch complex

287 properly through conformational changes in FliG2 to achieve the desired direction of flagellar  
288 rotation.

289

## 290 **Acknowledgements**

291 We thank Michael Manson, Justin Radolf, and Michio Homma for critical reading and  
292 suggestion. This work was supported by grants from the National Institute of Allergy and  
293 Infectious Diseases (R01AI087946, R01AI078958, R01AI132818, and R01AI59048) and the  
294 National Institute of Dental and Craniofacial Research (R01DE023080). This work is  
295 dedicated to the memory of Prof. Fanghua Li, who was an incredible scientist and a trusted  
296 mentor for YC, JL, and many others in the field of electron microscopy.

297

## 298 **Author contributions**

299 J.L. and C.L. conceived the project. Y.C. performed cryoET experiments, data analysis,  
300 modeling and wrote the manuscript draft. K.Z. performed genetical and biochemical  
301 experiments and analysis. B.C. and X. Z. contributed structural analysis. J.L. and C. L.  
302 supervised all work. M.M., S.J.N, and N.W.C. provided *B. burgdorferi* strains, Y.C, C.L., and  
303 J.L. prepared the manuscript with input from all authors.

304

## 305 **Competing interest statement**

306 The authors declare no competing interests

## 307 References

- 308 1 Berg, H. C. The rotary motor of bacterial flagella. *Annu. Rev. Biochem.* **72**, 19-54  
309 (2003).
- 310 2 Chevance, F. F. & Hughes, K. T. Coordinating assembly of a bacterial macromolecular  
311 machine. *Nat Rev Microbiol* **6**, 455-465 (2008).
- 312 3 Minamino, T., Kinoshita, M. & Namba, K. Directional Switching Mechanism of the  
313 Bacterial Flagellar Motor. *Comput Struct Biotechnol J* **17**, 1075-1081,  
314 doi:10.1016/j.csbj.2019.07.020 (2019).
- 315 4 Terashima, H., Kojima, S. & Homma, M. Flagellar motility in bacteria structure and  
316 function of flagellar motor. *Int Rev Cell Mol Biol* **270**, 39-85, doi:S1937-  
317 6448(08)01402-0 [pii]. 10.1016/S1937-6448(08)01402-0 (2008).
- 318 5 Wadhams, G. H. & Armitage, J. P. Making sense of it all: bacterial chemotaxis. *Nat*  
319 *Rev Mol Cell Biol* **5**, 1024-1037, doi:10.1038/nrm1524 (2004).
- 320 6 Parkinson, J. S., Hazelbauer, G. L. & Falke, J. J. Signaling and sensory adaptation in  
321 *Escherichia coli* chemoreceptors: 2015 update. *Trends Microbiol* **23**, 257-266,  
322 doi:10.1016/j.tim.2015.03.003 (2015).
- 323 7 Lele, P. P., Branch, R. W., Nathan, V. S. & Berg, H. C. Mechanism for adaptive  
324 remodeling of the bacterial flagellar switch. *Proc Natl Acad Sci U S A* **109**, 20018-  
325 20022, doi:10.1073/pnas.1212327109 (2012).
- 326 8 Delalez, N. J., Berry, R. M. & Armitage, J. P. Stoichiometry and Turnover of the  
327 Bacterial Flagellar Switch Protein FliN. *mBio* **5**, e01216-01214,  
328 doi:10.1128/mBio.01216-14 (2014).
- 329 9 Charon, N. W. *et al.* The unique paradigm of spirochete motility and chemotaxis. *Ann*  
330 *Rev Microbiol* **66**, 349-370 (2012).
- 331 10 Nakamura, S. Spirochete Flagella and Motility. *Biomolecules* **10**,  
332 doi:10.3390/biom10040550 (2020).
- 333 11 Berg, H. C. How spirochetes may swim. *J Theor Biol* **56**, 269-273, doi:10.1016/s0022-  
334 5193(76)80074-4 (1976).
- 335 12 Li, C. *et al.* Asymmetrical flagellar rotation in *Borrelia burgdorferi* nonchemotactic  
336 mutants. *Proc Natl Acad Sci U S A* **99**, 6169-6174, doi:10.1073/pnas.092010499 (2002).
- 337 13 Motaleb, M. A., Liu, J. & Wooten, R. M. Spirochetal motility and chemotaxis in the  
338 natural enzootic cycle and development of Lyme disease. *Curr Opin Microbiol* **28**, 106-  
339 113, doi:10.1016/j.mib.2015.09.006 (2015).
- 340 14 Motaleb, M. A. *et al.* CheX is a phosphorylated CheY phosphatase essential for  
341 *Borrelia burgdorferi* chemotaxis. *J Bacteriol* **187**, 7963-7969,  
342 doi:10.1128/JB.187.23.7963-7969.2005 (2005).

- 343 15 Chen, S. *et al.* Structural diversity of bacterial flagellar motors. *EMBO J* **30**, 2972-2981,  
344 doi:10.1038/emboj.2011.186 (2011).
- 345 16 Zhao, X., Norris, S. J. & Liu, J. Molecular architecture of the bacterial flagellar motor  
346 in cells. *Biochemistry* **53**, 4323-4333, doi:10.1021/bi500059y (2014).
- 347 17 Kojima, S. & Blair, D. F. The bacterial flagellar motor: structure and function of a  
348 complex molecular machine. *Int Rev Cytol* **233**, 93-134, doi:10.1016/S0074-  
349 7696(04)33003-2. S0074769604330032 [pii] (2004).
- 350 18 Chang, Y. *et al.* Structural insights into flagellar stator-rotor interactions. *Elife* **8**,  
351 doi:10.7554/eLife.48979 (2019).
- 352 19 Zhou, J., Lloyd, S. A. & Blair, D. F. Electrostatic interactions between rotor and stator  
353 in the bacterial flagellar motor. *Proc Natl Acad Sci U S A* **95**, 6436-6441 (1998).
- 354 20 Chun, S. Y. & Parkinson, J. S. Bacterial motility: membrane topology of the  
355 *Escherichia coli* MotB protein. *Science* **239**, 276-278 (1988).
- 356 21 Kojima, S. *et al.* The Helix Rearrangement in the Periplasmic Domain of the Flagellar  
357 Stator B Subunit Activates Peptidoglycan Binding and Ion Influx. *Structure* **26**, 590-  
358 598.e595, doi:https://doi.org/10.1016/j.str.2018.02.016 (2018).
- 359 22 Lloyd, S. A. & Blair, D. F. Charged residues of the rotor protein FliG essential for  
360 torque generation in the flagellar motor of *Escherichia coli*. *J Mol Biol* **266**, 733-744,  
361 doi:10.1006/jmbi.1996.0836 (1997).
- 362 23 Li, C., Xu, H., Zhang, K. & Liang, F. T. Inactivation of a putative flagellar motor switch  
363 protein FliG1 prevents *Borrelia burgdorferi* from swimming in highly viscous media  
364 and blocks its infectivity. *Mol Microbiol* **75**, 1563-1576 (2010).
- 365 24 Takekawa, N. *et al.* The tetrameric MotA complex as the core of the flagellar motor  
366 stator from hyperthermophilic bacterium. *Sci Rep* **6**, 31526, doi:10.1038/srep31526  
367 (2016).
- 368 25 Kojima, S. *et al.* Stator assembly and activation mechanism of the flagellar motor by  
369 the periplasmic region of MotB. *Mol Microbiol* **73**, 710-718, doi:10.1111/j.1365-  
370 2958.2009.06802.x (2009).
- 371 26 Thomas, D. R., Francis, N. R., Xu, C. & DeRosier, D. J. The Three-Dimensional  
372 Structure of the Flagellar Rotor from a Clockwise-Locked Mutant of *Salmonella*  
373 *enterica* Serovar Typhimurium. *J Bacteriol* **188**, 7039-7048, doi:10.1128/jb.00552-06  
374 (2006).
- 375 27 Motaleb, M. A., Sultan, S. Z., Miller, M. R., Li, C. & Charon, N. W. CheY3 of *Borrelia*  
376 *burgdorferi* is the key response regulator essential for chemotaxis and forms a long-  
377 lived phosphorylated intermediate. *J Bacteriol* **193**, 3332-3341, doi:10.1128/JB.00362-  
378 11 (2011).
- 379 28 McDowell, M. A. *et al.* Characterisation of *Shigella* Spa33 and *Thermotoga* FliM/N  
380 reveals a new model for C-ring assembly in T3SS. *Mol Microbiol* **99**, 749-766,  
381 doi:10.1111/mmi.13267 (2016).

- 382 29 Carroll, B. L. *et al.* The flagellar motor of *Vibrio alginolyticus* undergoes major  
383 structural remodeling during rotational switching, doi:10.1101/2020.04.24.060053  
384 (biorxiv, 2020).
- 385 30 Sultan, S. Z., Pitzer, J. E., Miller, M. R. & Motaleb, M. A. Analysis of a *Borrelia*  
386 *burgdorferi* phosphodiesterase demonstrates a role for cyclic-di-guanosine  
387 monophosphate in motility and virulence. *Mol Microbiol* **77**, 128-142,  
388 doi:10.1111/j.1365-2958.2010.07191.x (2010).
- 389 31 Vartanian, A. S., Paz, A., Fortgang, E. A., Abramson, J. & Dahlquist, F. W. Structure  
390 of flagellar motor proteins in complex allows for insights into motor structure and  
391 switching. *J Biol Chem* **287**, 35779-35783, doi:10.1074/jbc.C112.378380 (2012).
- 392 32 Lee, L. K., Ginsburg, M. A., Crovace, C., Donohoe, M. & Stock, D. Structure of the  
393 torque ring of the flagellar motor and the molecular basis for rotational switching.  
394 *Nature* **466**, 996-1000, doi:10.1038/nature09300 (2010).
- 395 33 Minamino, T. *et al.* Structural insight into the rotational switching mechanism of the  
396 bacterial flagellar motor. *PLoS Biol* **9**, e1000616, doi:10.1371/journal.pbio.1000616  
397 (2011).
- 398 34 Brown, P. N., Hill, C. P. & Blair, D. F. Crystal structure of the middle and C-terminal  
399 domains of the flagellar rotor protein FliG. *EMBO J* **21**, 3225-3234,  
400 doi:10.1093/emboj/cdf332 (2002).
- 401 35 Nishikino, T. *et al.* Rotational direction of flagellar motor from the conformation of  
402 FliG middle domain in marine *Vibrio*. *Sci Rep* **8**, 17793, doi:10.1038/s41598-018-  
403 35902-6 (2018).
- 404 36 Leake, M. C. *et al.* Stoichiometry and turnover in single, functioning membrane protein  
405 complexes. *Nature* **443**, 355-358, doi:10.1038/nature05135 (2006).
- 406 37 Celia, H., Noinaj, N. & Buchanan, S. K. Structure and Stoichiometry of the Ton  
407 Molecular Motor. *Int J Mol Sci* **21**, doi:10.3390/ijms21020375 (2020).
- 408



409 **Figures and Figure Legends:**

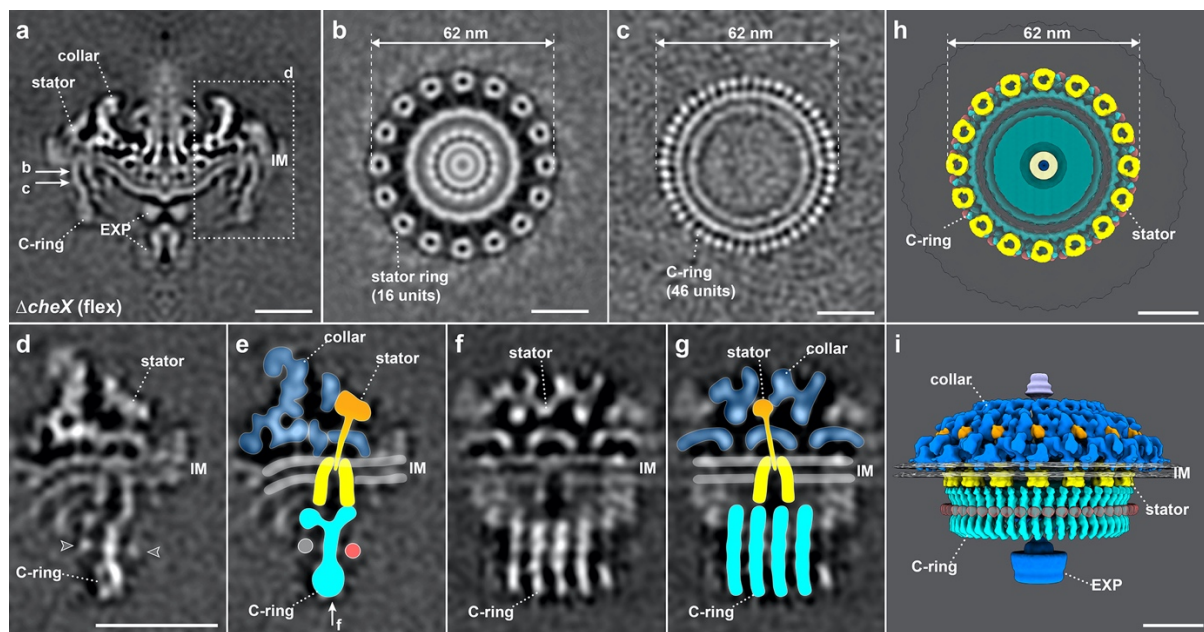

410

411 **Figure 1. Structure of the flagellar motor in constantly flexing  $\Delta cheX$  cells.** (a) A medial  
412 cross-section of the *in situ* flagellar motor structure in  $\Delta cheX$  determined by subtomogram  
413 averaging. The collar, stator, C-ring and export apparatus (EXP) are clearly visible in the  
414 cryoET map. (b) A perpendicular cross-section of the flagellar motor structure showing the  
415 stator ring. (c) The C-ring structure after focused alignment showing 46-fold symmetric  
416 features. (d-g) Stator-rotor interaction region (dash framed in panel a) after focused alignment.  
417 (e, g) The structures shown in (d and f) superimposed with the corresponding models in two  
418 different views. (h) A top view of the stator ring on the top of the C-ring. (i) A side view of the  
419 flagellar motor structure in 3D. Bar = 20 nm.

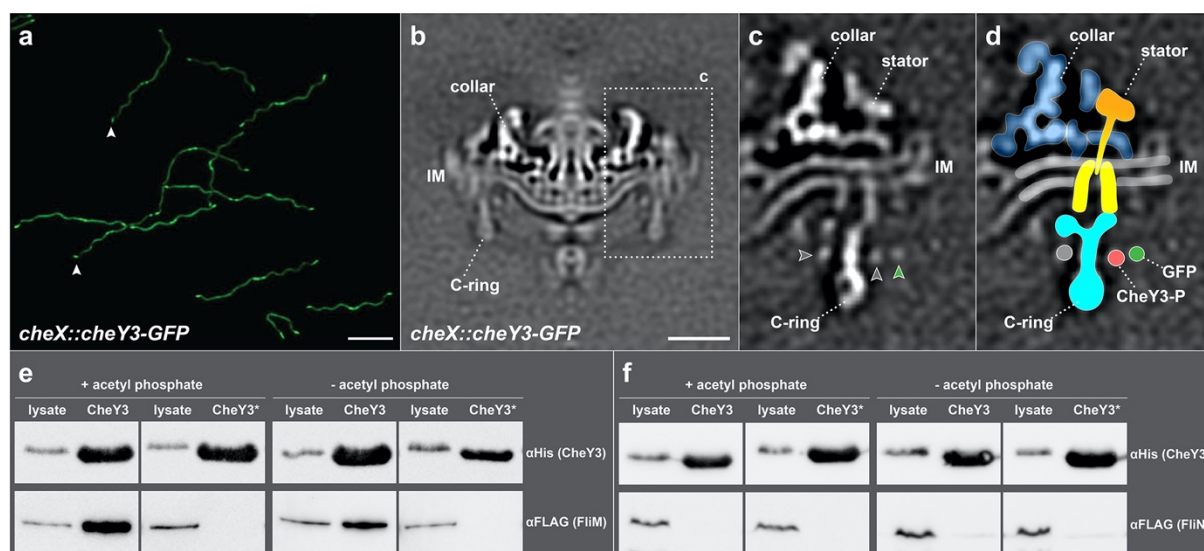

420

421 **Figure 2. CheY3-P binding to the flagellar motor.** (a) Fluorescence image of *cheX::cheY3-*  
 422 *GFP* cells showing that GFP-tagged CheY3 proteins are polarly localized. (b) A medial cross-  
 423 section of the flagellar motor structure in *cheX::cheY3-GFP* cells. (c) A refined structure of the  
 424 stator-rotor interface (dash framed in panel b) in *cheX::cheY3-GFP*. Extra density (green arrow)  
 425 is associated with the C-ring. (d) A cartoon model is superimposed onto the structure shown  
 426 in panel c. The GFP density (green arrow indicated in panel c and green color highlighted in  
 427 d) is located outside the C-ring. (e, f) Ni-NTA affinity purifications using the poly-histidine  
 428 modified proteins HisCheY3 or HisCheY3\* (CheY3<sup>D79A</sup>) to pull down FLAG-tagged FliM  
 429 (FliM-FLAG) and FLAG-tagged FliN (FliN-FLAG), respectively. FliM-FLAG was co-  
 430 purified with HisCheY3, but not with HisCheY3\*, and more FliM-FLAG protein was co-  
 431 purified with HisCheY3 in the presence of acetyl phosphate (e). There was no FliN-FLAG co-  
 432 purified with HisCheY3/CheY3\* (f). These results indicate that CheY3 binds to FliM protein  
 433 in a phosphorylation-dependent manner. Bar = 10  $\mu$ m in panel a, Bar = 20 nm in panel b.

434

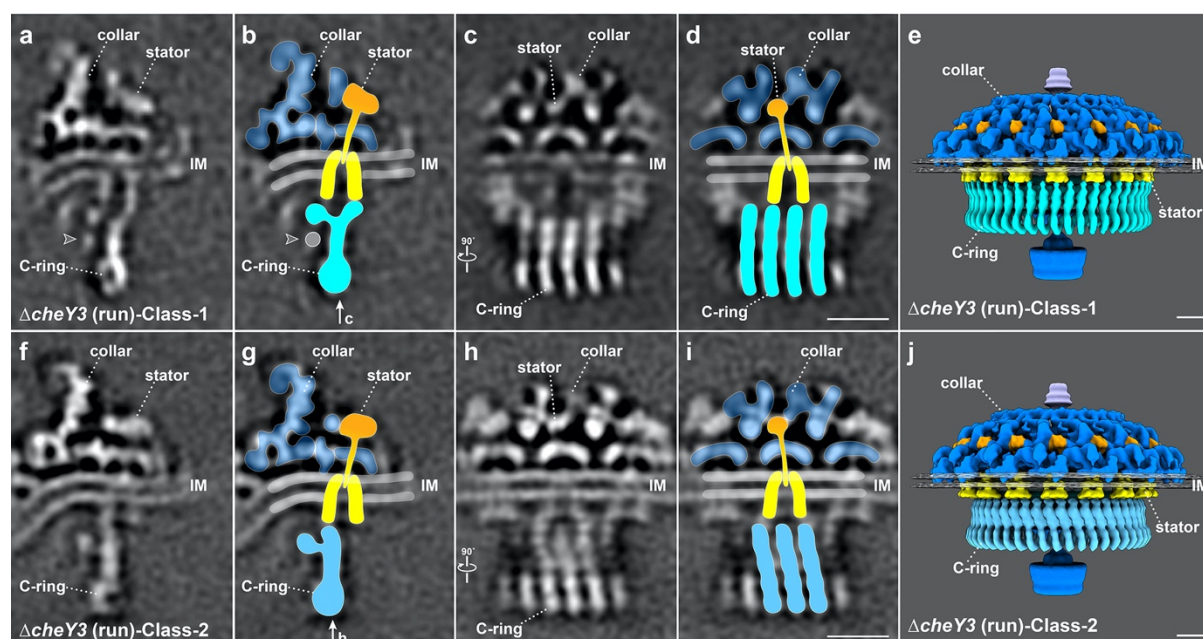

435

436 **Figure 3. Stator-rotor interactions in constantly running  $\Delta cheY3$  cells.** Two distinct  
437 conformations of the C-ring are observed in  $\Delta cheY3$  cells. (a-e) Detailed motor conformation  
438 in the  $\Delta cheY3$ -Class-1 with the same views as shown in Fig.1d-g, i. (f-j) Detailed motor  
439 structures in the  $\Delta cheY3$ -Class-2. The C-ring appears strikingly different in two class averages.  
440 In Class-1, the C-ring interacts with the outer part of the stator; while in Class-2, the C-ring  
441 interacts with the inner part of the stator. (e, j) 3D surface views of the  $\Delta cheY3$ -Class-1 and  
442  $\Delta cheY3$ -Class-2 flagellar motors. Note that the C-ring has two distinct conformations, enabling  
443 two different interactions with the stator complexes. Bar = 10 nm.

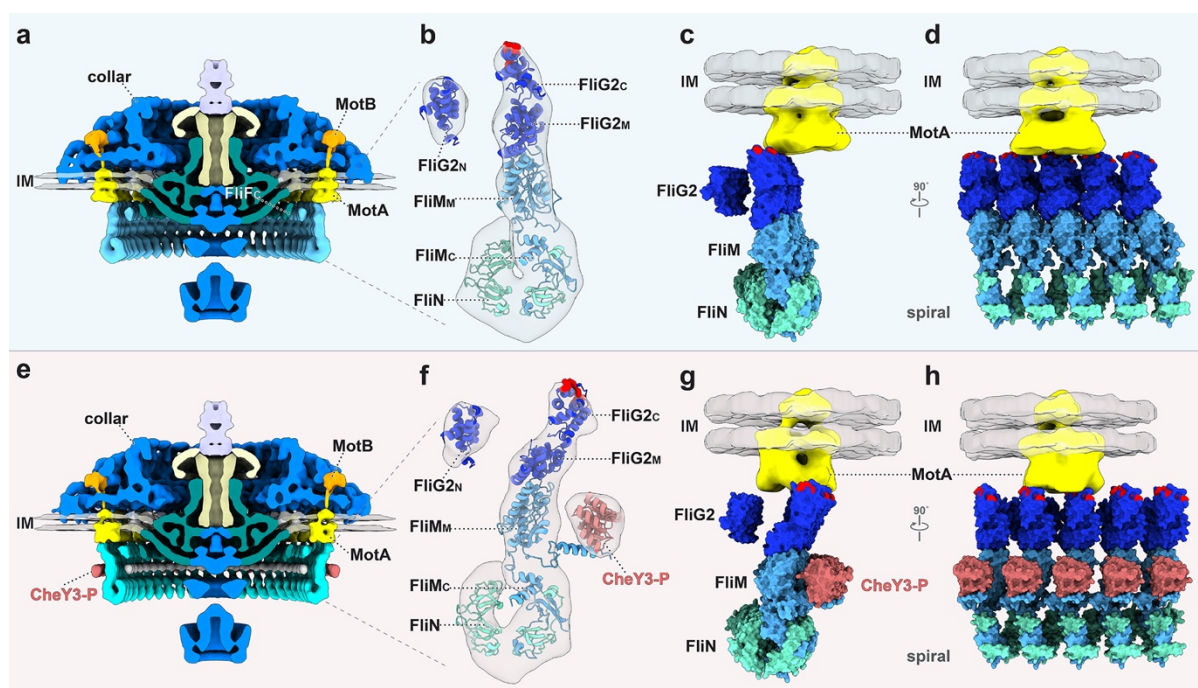

444

445 **Figure 4. Molecular architectures of the flagellar motors without and with CheY3-P. (a)**

446 A medial cross-section of the flagellar motor structure without CheY3-P. **(b)** A pseudoatomic

447 model of the C-ring unit shown in panel a. FliM and FliN have a stoichiometry of 1:3, and the

448 C-terminal of FliM (FliMc) together with three FliN units form a spiral at the base of the C-

449 ring. **(c)** Interactions between the bell-shaped stator complex and the C-ring. The charged

450 residues (Lys275, Arg292, Glu299, and Asp300 in red) in FliG2c interact with inner part of

451 the stator complex. **(d)** A different view of five C-ring units connected at the based on the C-

452 ring. **(e)** A medial cross-section of the flagellar motor structure in the presence of CheY3-P. **(f)**

453 A pseudoatomic model of the C-ring unit with CheY3-P binding on the N-terminal of FliM

454 (FliMn). **(g)** The charged residues (Lys275, Arg292, Glu299, and Asp300 in red) in FliG2c

455 interact with outer part of the stator complex. **(h)** A different view of four C-ring units are

456 occupied by four CheY3-P proteins.

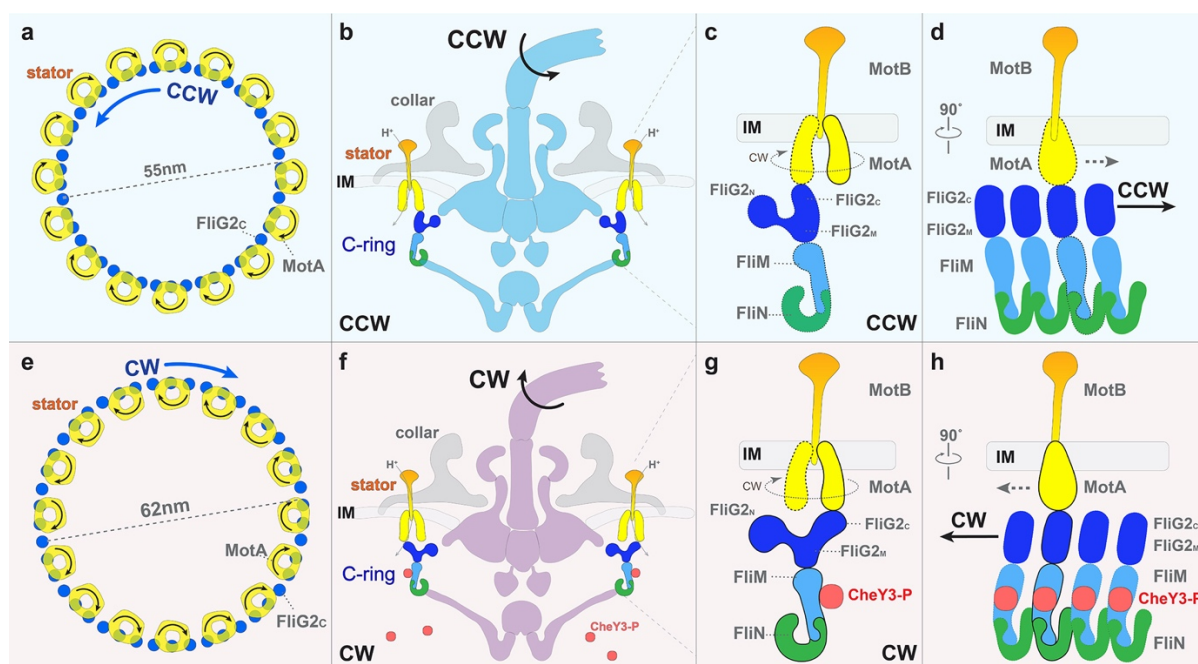

457

458 **Figure 5. Model for the mechanism of rotational switching.** (a, b) Interactions of the stator  
 459 with FliG2 in the C-ring during CCW rotation. In the default state when there is no bound  
 460 CheY3-P, the FliG2 proteins interact with the inner part of the stator complex (colored in  
 461 yellow). With the influx of protons through the stator channel, the cytoplasmic subunits of each  
 462 stator complex spins CW. Therefore, the C-ring (blue) is induced to spin CCW. (c) A zoomed-  
 463 in view of the interaction between the C-ring and the stator complex. (d) A perpendicular view  
 464 shows that four C-ring units are connected by FliM/FliN interactions. (e, f) CheY3-P induced  
 465 conformational changes in the C-ring result in altered interactions between the stator and C-  
 466 ring, thereby causing the switch to CW rotation. When CheY3-P binds to FliM on the exterior  
 467 surface of the C-ring, its binding triggers the shift (g) and tilt (h) of FliG2 so that FliG2<sub>C</sub>  
 468 interacts with the outer part of the cytoplasmic domain of the stator complex (g). Because the  
 469 cytoplasmic domain of the stator always spins CW, the C-ring is induced to spin CW (e).  
 470 During the rotational switch, the spiral ring structure formed by FliM and FliN acts as a base  
 471 to hold the C-ring structure together (d, h).

## 472 **Materials and Methods**

473 **Bacterial strains and growth conditions.** A high-passage *B. burgdorferi* sensu stricto strain  
474 B31A (WT) and its isogenic mutants were grown in Barbour-Stoenner-Kelly II (BSK-II) liquid  
475 medium or on semisolid agar plates at 34°C in the presence of 3.4% carbon dioxide as  
476 previously described<sup>38,39</sup>.

477 *Escherichia coli* TOP10 strain (Invitrogen, Carlsbad, CA, USA) was used for DNA  
478 cloning and plasmid amplifications. BL21 strains transformed with GroEL-GroES chaperones  
479 (Takara Bio USA) were used for recombinant protein preparations. *E. coli* strains were cultured  
480 in lysogeny broth (LB) supplemented with appropriate antibiotics as needed. The  $\Delta cheX$  and  
481  $\Delta cheY3$  mutants of *B. burgdorferi* were constructed and characterized as previously  
482 described<sup>40,41</sup>.

483

484 **Inactivation of *cheX* using *cheY3-gfp*.** The vectors for in frame replacing *cheX-cheY3* with  
485 *cheY3-gfp* were constructed by using a PCR-based fusion method as previously described<sup>41</sup>.  
486 Briefly, the PCR primers (containing complementary overlaps to downstream fragment) were  
487 designed immediately flanking the *cheX-cheY3* genes, to generate approximate 1-kb products  
488 upstream and downstream of the coding sequences. The primers for the *flgB* promoter, *cheY3*,  
489 *gfp* and streptomycin resistance cassette (*str*) were designed. Initial PCR amplifications for  
490 each of individual fragments (i.e., 5'- and 3'-flanking DNA of *cheX-cheY3*, *flgB* promoter,  
491 *cheY3*, *gfp*, and *str*) were performed, followed by a fusion PCR connecting all the fragments  
492 together, generating the constructs of *cheY3-gfp::str* (Extended Data Fig. 5). The resultant  
493 constructs were transformed into competent B31A cells by electroporation to delete *cheX*-  
494 *cheY3* genes. The resultant mutant clones were confirmed by PCR and western blots using  
495 antibodies against GFP, CheY3 and CheX, respectively.

496 **Light and fluorescence Microscopy.** Fluorescence images of *cheX::cheY3-GFP B.*  
497 *burgdorferi* cells were taken using a Zeiss Axiostar plus microscope at a wavelength of 480  
498 nm. The images were captured and processed using the program ZEN (Zeiss, Germany).

499  
500 **Co-expression and purification of CheY3/CheY3\* and FliM/FliN.** The full-length *cheY3* or  
501 *cheY3\** (in *cheY3\**, Asp79, a key residue required for the phosphorylation, was replaced by  
502 Ala (Extended Data Table 2). The *cheY3* gene was first amplified by PCR (primers P15/P16)  
503 using DNA polymerase (Invitrogen, Carlsbad, CA) with engineered BamHI and SacI cut sites  
504 at its 5' and 3' ends, respectively. The amplicon was cloned into the pGEM-T Easy vector  
505 (Promega, Madison, WI) and then subcloned into the pQE80 expression vector (Qiagen,  
506 Valencia, CA), yielding a vector of pQE80CheY3/CheY3\*, and thereby incorporating an N-  
507 terminal histidine (His) tag. The full-length *fliM* and *fliN* genes (without stop codon) were PCR  
508 amplified (primers P17/P18 and P19/P20) using DNA polymerase (Invitrogen, Carlsbad, CA)  
509 with engineered SacI at its 5' end and FLAG tag and Sall cut site at the 3' ends. The amplicons  
510 were first cloned into the pGEM-T Easy vector and then digested using SacI and Sall and  
511 subcloned into precut pQE80CheY3/CheY3\*. The resultant plasmid was then transformed into  
512 the BL21 strain that harbors GroEL-GroES chaperones for protein production. The expression  
513 of recombinant proteins in *E. coli* cells was induced with 1 mM isopropyl- $\beta$ -D-thiogalactoside  
514 (IPTG) overnight at 16°C. Recombinant HisCheY or HisCheY\* and bound proteins were purified  
515 using nickel agarose columns (Qiagen) under native conditions per manufacturers' instructions.

516  
517 **Site-directed mutagenesis of CheY3.** Site-directed mutagenesis was performed using  
518 QuikChange site-directed mutagenesis kit (Stratagene, San Diego, CA) per manufacturer's  
519 instructions. The above constructed *cheY3* pGEM-T Easy vector was used as a template for  
520 the mutagenesis. Amino acids in CheY3 (Asp79) were substituted with Ala, using primers

521 P13/P14. The mutation was confirmed by DNA sequencing analysis. The mutated genes were  
522 PCR amplified and subcloned into pQE80 expression vector as described before.

523

524 **Preparation of cryoET samples.** *B. burgdorferi* cells were cultured to log phase, then  
525 centrifuged in 1.5 ml tubes at 4-5,000 rpm for ~5 minutes, the resulting pellet was rinsed gently  
526 with 1 mL phosphate buffered saline (PBS). The cells were centrifuged again and finally  
527 suspended in 20-100  $\mu$ L PBS to obtain an appropriate concentration for plunge freezing. The  
528 cell solution was then mixed with 10 nm colloidal gold fiducial markers. CryoET samples were  
529 prepared using copper grids with holey carbon support film (200 mesh, R2/1, Quantifoil). The  
530 grids were glow-discharged for 30 seconds before we deposited 5  $\mu$ L cell solution on them.  
531 Then the grids were blotted with filter paper and rapidly frozen in liquid ethane using a  
532 homemade gravity-driven plunger apparatus.

533

534 **CryoET data collection and tomogram reconstruction.** The frozen-hydrated samples were  
535 transferred to a 300 kV Titan Krios electron microscope (Thermo Fisher) equipped with a  
536 Direct Electron Detector and energy filter (Gatan). For the  $\Delta cheX$  and  $\Delta cheY3$  samples: Images  
537 were recorded at 53K magnification with pixel size of 2.747  $\text{\AA}$ . SerialEM<sup>42</sup> was used to collect  
538 tilt series at 2 to 4  $\mu$ m defocus, starting from 36°, with accumulative dose of ~60-70  $e^-/\text{\AA}^2$   
539 distributed over 35 images and covering angles from -51° to 51°, with a tilt step of 3°. For the  
540 *cheX::cheY3-GFP* sample: Images were recorded at 64K magnification with pixel size of 2.245  
541  $\text{\AA}$ . The tilt series were collected in two different strategies using SerialEM<sup>42</sup> with accumulated  
542 dose ~80  $e^-/\text{\AA}^2$ . Strategy 1: tilt series were collected under super-resolution, with 2 to 4  $\mu$ m  
543 defocus using the implemented dose-symmetric tilt scheme in SerialEM<sup>42</sup>. The dose-  
544 symmetric tilt scheme parameters were set as: start from 0°, tilt from -51° to 51° with 3° tilt  
545 step, group size 2 and stop alternating directions beyond 36° from the initial angle. Strategy 2:



546 tilt series were collected using the improved Fast Incremental Single Exposure method<sup>43</sup> with  
547 the dose-symmetric tilt scheme, 2 to 4  $\mu\text{m}$  defocus, tilt from  $-54^\circ$  to  $54^\circ$  with  $3^\circ$  tilt step and  
548 group size 2. 133 and 56 tilt series were collected in strategy 1 and strategy 2, respectively.

549 All recorded images were first motion-corrected using MotionCorr2<sup>44</sup> and then stacked by  
550 IMOD<sup>45</sup>. The tilt series were aligned using fiducial markers or fiducial free alignment by  
551 IMOD. Gctf<sup>46</sup> was used to determine the defocus of each tilt image in the aligned stacks and  
552 the “ctfphaseflip” function in IMOD was used to do the contrast transfer function (CTF)  
553 correction for the tilt images. Tomograms were then reconstructed by weighted back-projection  
554 using IMOD<sup>45</sup> with the CTF corrected aligned stacks.

555

556 **Subtomogram averaging and corresponding analysis.** Bacterial flagellar motors were  
557 manually picked from the bin6 tomograms as described<sup>47</sup>. The subtomograms of flagellar  
558 motors were first extracted from the bin6 tomograms, then the i3 software package<sup>48,49</sup> was  
559 used for 3D alignment and classification to get the refined particle positions and remove junk  
560 particles. Afterwards, the subtomograms were extracted from unbinned tomograms with the  
561 refined positions and furtherly binned by 2 or 4 based on the requirement for alignment and  
562 classification. In total, 1,065 subtomograms of  $\Delta cheX$  motors, 2,087 subtomograms of  $\Delta cheY3$   
563 motors and 1,250 subtomograms of *cheX::cheY3*-GFP motors (879 motors and 371 motors  
564 from tilt series collected in strategy 1 and strategy 2, respectively) were selected from the  
565 tomographic reconstructions and used for subtomogram analysis. Class averages were  
566 computed in Fourier space so that the missing wedge problem of tomography was  
567 minimized<sup>49,50</sup>. Gold standard Fourier shell correlation coefficients were calculated by  
568 generating the correlation between two randomly divided halves of the aligned images used to  
569 estimate the resolution and to generate the final maps.

570 Focused refinement, multi-reference alignment (MRA) and 3D classification of the whole  
571 C-ring structure: after we got the initial whole motor structure, we did small angular search  
572 along the motor rod to refine the C-ring structure. During the refinement, a 3D molecular mask  
573 slightly bigger than the C-ring part was applied to the reference and the angular search range  
574 was restricted to be smaller than  $\pm 5^\circ$  so that we can maintain the overall alignment of the motor.  
575 Then we got the refined C-ring structures in  $\Delta cheX$  (Extended Data Fig. 3c) and  $\Delta cheY3$   
576 (Extended Data Fig. 7d) flagellar motors after several cycles' refinement. Afterwards, these  
577 two C-ring structures were used as the references for the MRA. MRA was applied for both  
578  $\Delta cheX$  and  $\Delta cheY3$  mutants followed by 3D classification. Then we got the two different C-  
579 ring conformations in  $\Delta cheY3$  motors (Extended Data Fig. 7h, i), but just one C-ring  
580 conformation in  $\Delta cheX$  motors.

581 Focused refinement of the stator-rotor interaction region: each flagellar motor has 16 stator  
582 complexes. After the alignment for the whole motor structure, the regions around 16 stator  
583 complexes were first extracted from each motor, then we refined the 3D alignment and applied  
584 3D classification to remove particles with bad contrast or large distortions to get the refined  
585 structures. Such focused refinement was applied to four motor sets: the  $\Delta cheX$  motors, the  
586  $\Delta cheY3$ -Class1 motors, the  $\Delta cheY3$ -Class2 motors and the  $cheX::cheY3$ -GFP motors.

587 Focused alignment of the C-ring subunit in different cell tips of  $\Delta cheY3$  cells (Extended  
588 Data Fig. 8): for the motors at one tip of a  $\Delta cheY3$  cell, we first aligned the whole motor  
589 structure, then we applied symmetry expansion based on the C-ring symmetry (46-fold  
590 symmetry) and did MRA alignment for the C-ring subunit (dash framed region in (Extended  
591 Data Fig. 8d) to generate a refined structure (Extended Data Fig. 8e, f)). The C-ring structures  
592 shown in (Extended Data Fig. 7h, i) were used as references for the MRA alignment.  
593 Afterwards, we can identify the rotation direction of these motors based on the twist direction  
594 of the refined C-ring subunit. The rotation direction of the motors at another cell tip were

595 determined in the same way. Similar analysis was applied to other 4  $\Delta cheY3$  cells. The motors  
596 at different cell tips were found to rotate in opposite directions, then we merged all CCW or  
597 CW rotating motors together and generated the structures shown in (Extended Data Fig. 8j-l)  
598 or (Extended Data Fig. 8m-o), respectively.

599

600 **Model generation and refinement.** Based on the reported crystal structures of FliG<sub>C</sub> and  
601 FliG<sub>M</sub> (PDB 4FHR)<sup>51</sup>, FliG<sub>N</sub> (PDB 3HJL)<sup>52</sup>, FliM<sub>C</sub> and FliM<sub>M</sub> (PDB 4FHR)<sup>51</sup>, FliM<sub>N</sub> (PDB  
602 4YXB)<sup>53</sup>, FliN (PDB 1YAB)<sup>54</sup>, and CheY (PDB 4IGA)<sup>55</sup>, the *B. burgdorferi* C-ring proteins  
603 were generated using I-TASSER<sup>56-58</sup>. FliG<sub>2</sub>, FliM, and FliN were placed into the cryoET maps  
604 by using UCSF Chimera<sup>59</sup>. The unknown protein-protein interfaces were refined in Rosetta  
605 using the protein-protein docking scripts<sup>60</sup>. The model was refined using PHENIX Real Space  
606 Refinement<sup>61</sup> to move the protein domains relative to one another while preserving the known  
607 architecture of the C-ring subunits. MotB (PDB 2ZVY)<sup>62</sup> and MotA (EMD 3417)<sup>63</sup> were used  
608 to fit into the cryoET maps by using UCSF Chimera<sup>59</sup>.

609

610 **Three-dimensional visualization.** UCSF Chimera<sup>59</sup> and UCSF ChimeraX<sup>64</sup> were used for  
611 surface rendering of subtomogram averages, segmentation, and molecular modeling. Unrolled  
612 maps of the motor structures were generated using ‘vop unroll’ function of UCSF Chimera<sup>59</sup>.

613

614

615 **Extended Data Figures and Tables**

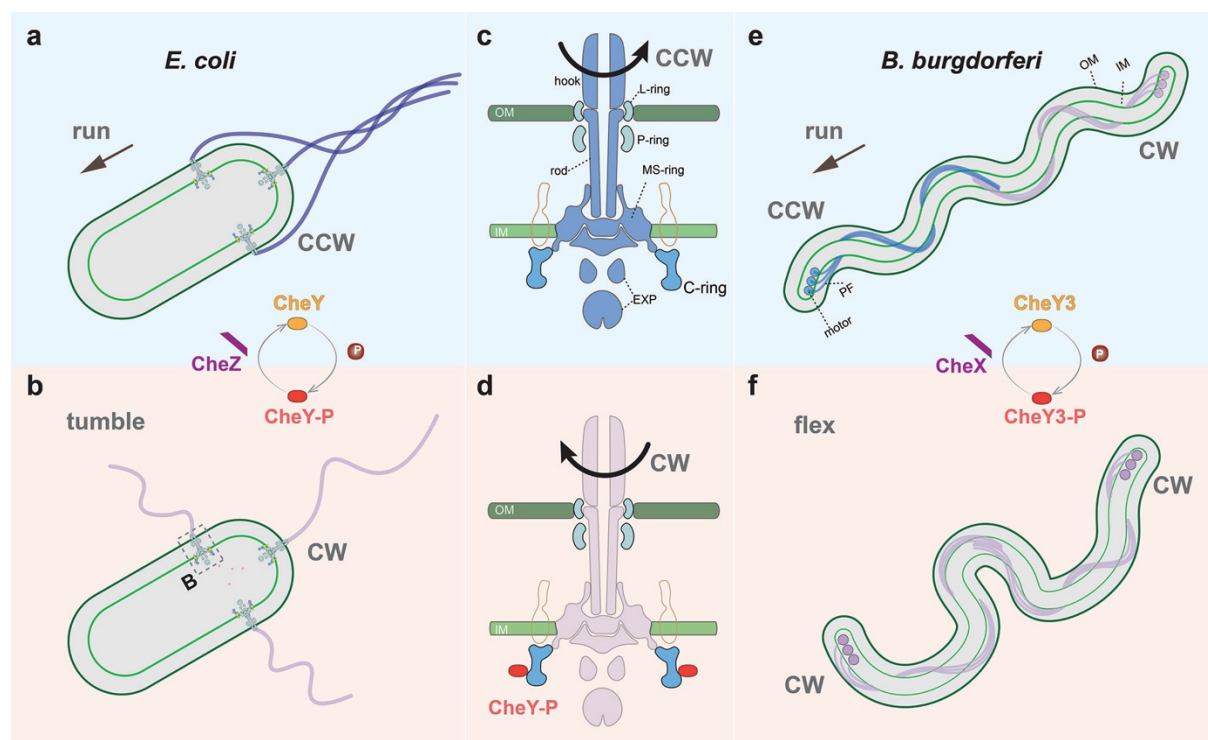

616

617

618 **Extended Data Fig. 1. Swimming motility modes and flagellar switching in *E. coli* and *B.***

619 ***burgdorferi*.** (a, b) Cartoon of the swimming motility modes in *E. coli*: run and tumble. (c) The

620 motor rotates CCW as a default state. (d) When the level of CheY-P becomes high enough,

621 CheY-P binds to the C-ring, and the motor switches to CW rotation. The chemotaxis protein

622 CheZ dephosphorylates CheY-P to return the motor to CCW rotation. (e, f) Swimming motility

623 modes in *B. burgdorferi*: run and flex. Periplasmic flagella (PF) are located between the inner

624 membrane (IM) and outer membrane (OM). The flagellar motors are attached near each cell

625 pole. Spirochetes run when the anterior flagella rotate CCW and the posterior flagella rotate

626 CW (e). When the flagella at both poles rotate in the same direction (CW), the spirochetes flex

627 in place and fail to move translationally. The swimming motility of *B. burgdorferi* is also

628 controlled by a chemotaxis system. The homologs of CheY and CheZ in *B. burgdorferi* are

629 CheY3 and CheX.

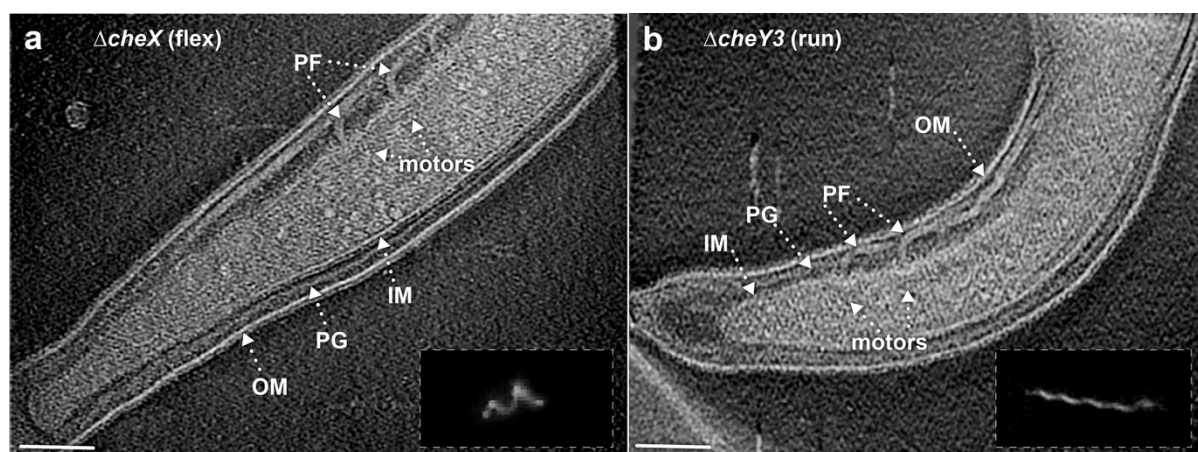

630

631

632 **Extended Data Fig. 2. Cryo-ET imaging of the flagellar motors in  $\Delta cheX$  and  $\Delta cheY3$**

633 **mutants. (a)** A representative tomographic section from a  $\Delta cheX$  cell tip reconstruction. Outer

634 membrane (OM), inner membrane (IM), peptidoglycan layer (PG), and motors are clearly

635 resolved in the tomogram. **(b)** A representative section of a tomogram from a  $\Delta cheY3$  cell tip.

636 Multiple motors with different orientations can be found at the cell tip. The insertions in **(a, b)**

637 are the dark-field images showing a  $\Delta cheX$  cell constantly flexing and a constantly running

638  $\Delta cheY3$  cell, respectively.

639

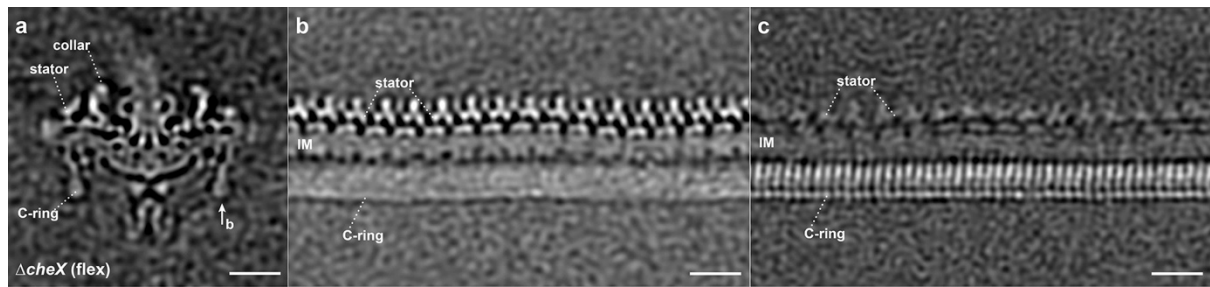

640

641

642 **Extended Data Fig. 3. Refined structure of the C-ring in the  $\Delta cheX$  motor.** (a) A medial  
643 cross-section of an averaged map of the  $\Delta cheX$  motor. (b) The unrolled map refined using the  
644 stator region densities shows 16 stator complexes are embedded in the inner membrane (IM),  
645 while the C-ring subunits are unresolved due to symmetry mismatch between the C-ring and  
646 the stator. (c) The unrolled map refined using the C-ring region densities shows 46-fold  
647 symmetric features, while the stator becomes blurry. Bar = 20 nm.

648

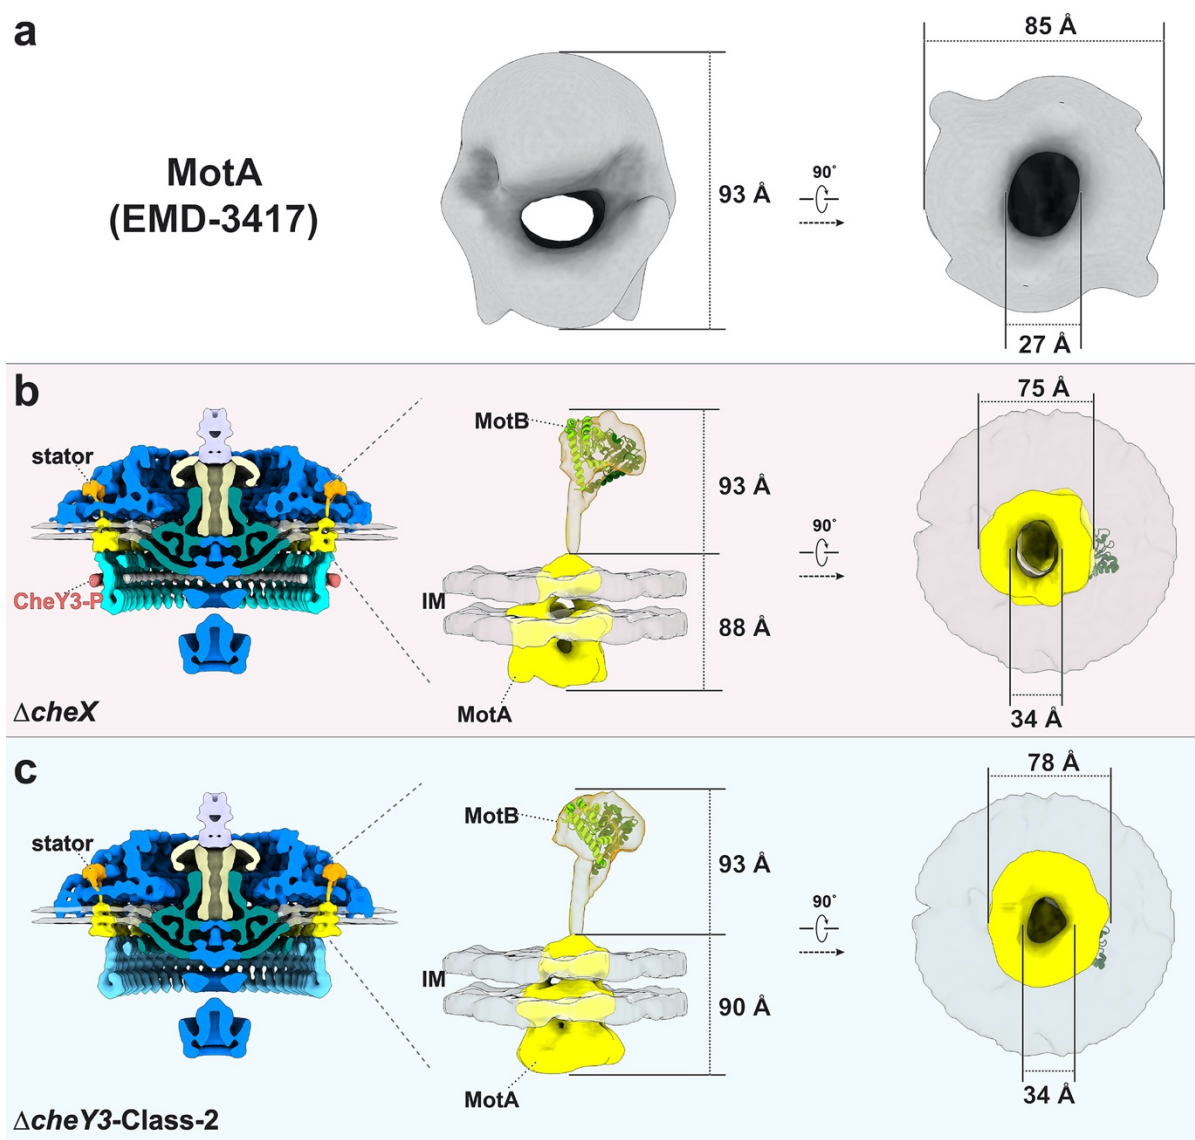

649

650

651 **Extended Data Fig. 4. Comparison between *in situ* stator complex and the purified stator**

652 **components. (a)** Structure of purified MotA complex from *A. aeolicus* resolved by single particle

653 EM (EMD 3417)<sup>63</sup>. **(b)** The *in situ* stator complex in the  $\Delta cheX$  motor has a bell-shaped

654 structure embedded in the inner membrane (IM) and a periplasmic domain. The top part of the

655 periplasmic domain matches well with the crystal structure of the *S. enterica* MotB periplasmic

656 domain (PDB 2ZVY)<sup>62</sup> (middle panel). The bell-shaped structure has similar size and shape as

657 the structure of EMD 3417 (right panel). **(c)** The *in situ* stator complex in the  $\Delta cheY3$ -Class-2

658 motor is similar to that in the  $\Delta cheX$  motor.

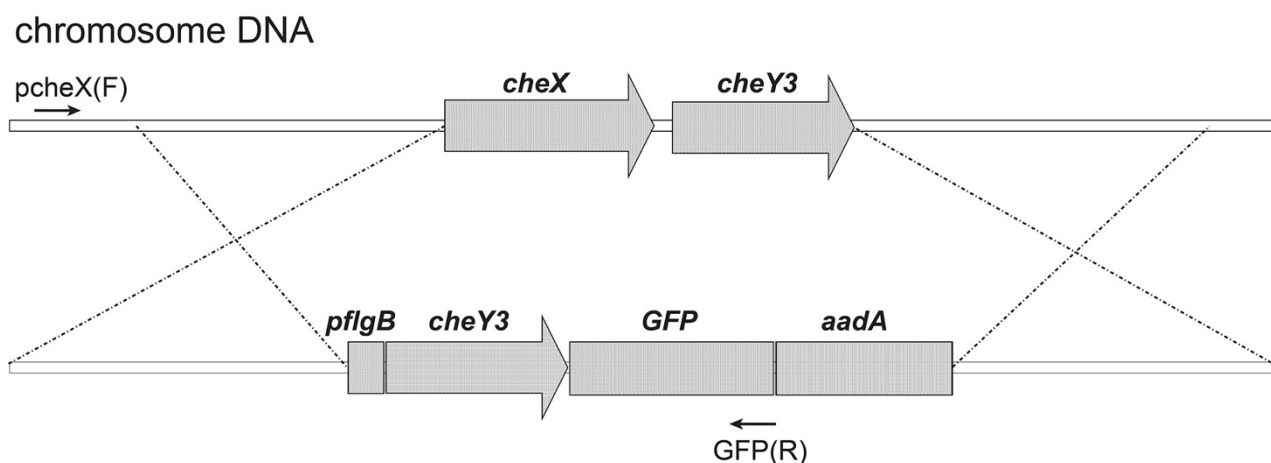

659

660 **Extended Data Fig. 5. Schematic diagram for the in-frame replacement of *cheX-cheY3***

661 **genes with *cheY3-gfp*. *aadA*, a streptomycin resistance gene was used as a selection marker.**

662 *pcheX(F)* and *GFP (R)* are oligonucleotide primers utilized to verify the occurrence of the allelic

663 exchange of the recombinant construct (bottom) into the targeted region in the *B. burgdorferi*

664 chromosome (top).

665

666

667



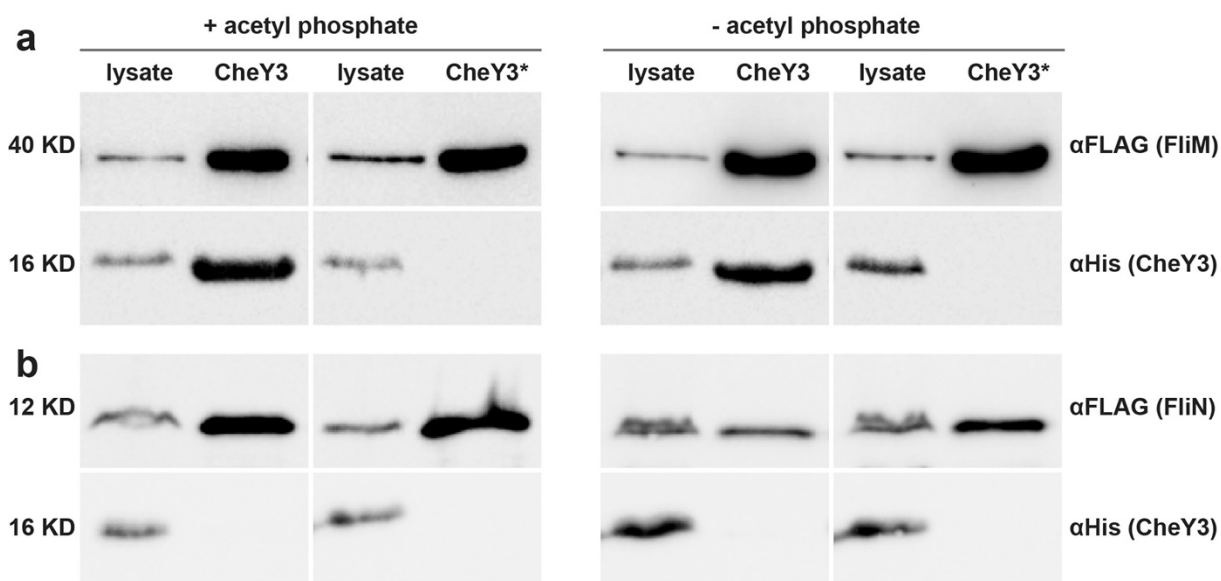

668

669

670 **Extended Data Fig. 6. FLAG affinity purification using FLAG-FliM/FliN to pull down**

671 **HisCheY3/CheY3\***. Ni-NTA affinity purification using FLAG-tagged FliM (FliM-FLAG)

672 and FLAG-tagged FliN (FliN-FLAG) to pull down HisCheY3 or HisCheY3\* (CheY3<sup>D79A</sup>),

673 respectively. HisCheY3 was co-purified with FliM-FLAG (a), but not with FliN-FLAG (b),

674 suggesting that CheY3 does not bind on FliN. In contrast, more HisCheY3 protein was co-

675 purified with FliM-FLAG with acetyl phosphate (a), and HisCheY3\* was not co-purified with

676 FliM-FLAG (a) or FliN-FLAG (b). These results indicate that CheY3 binds to FliM protein in

677 a phosphorylation-dependent manner.

678

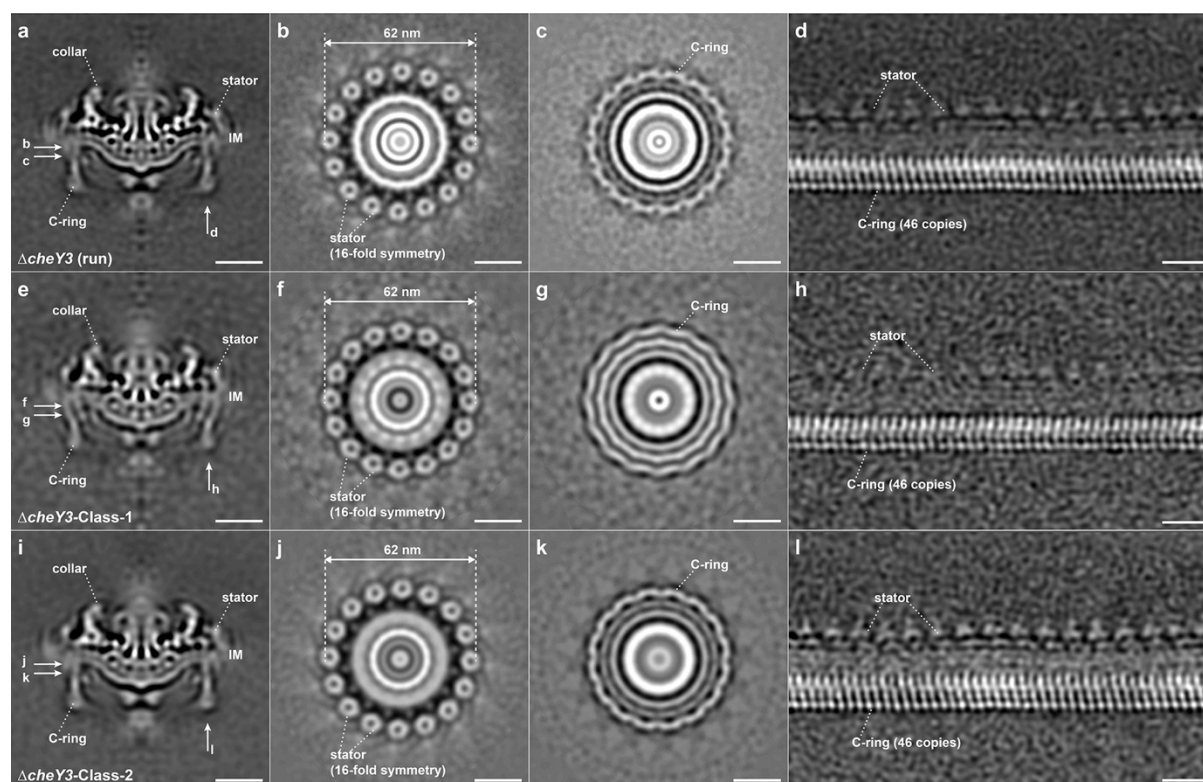

679

680

681 **Extended Data Fig. 7. Motor structures in constantly running  $\Delta cheY3$  cells.** (a) A medial  
682 cross-section of an averaged structure in  $\Delta cheY3$  *B. burgdorferi* cell. (b, c) Cross-sections show  
683 the stator ring and the C-ring, respectively. (d) Focused structure of the C-ring (unrolled along  
684 the central rod). Two distinct classes in the  $\Delta cheY3$  cells are named as  $\Delta cheY3$ -Class-1 (e-h)  
685 and  $\Delta cheY3$ -Class-2 (i-l). Class-1 and Class-2 account ~45% and ~55% of all the  $\Delta cheY3$   
686 motors we used for current work, respectively. The stator structures in Class-1 and Class-2 (f  
687 and j) are quite similar, while the C-ring subunits (compare h with l) are tilted in different  
688 directions.

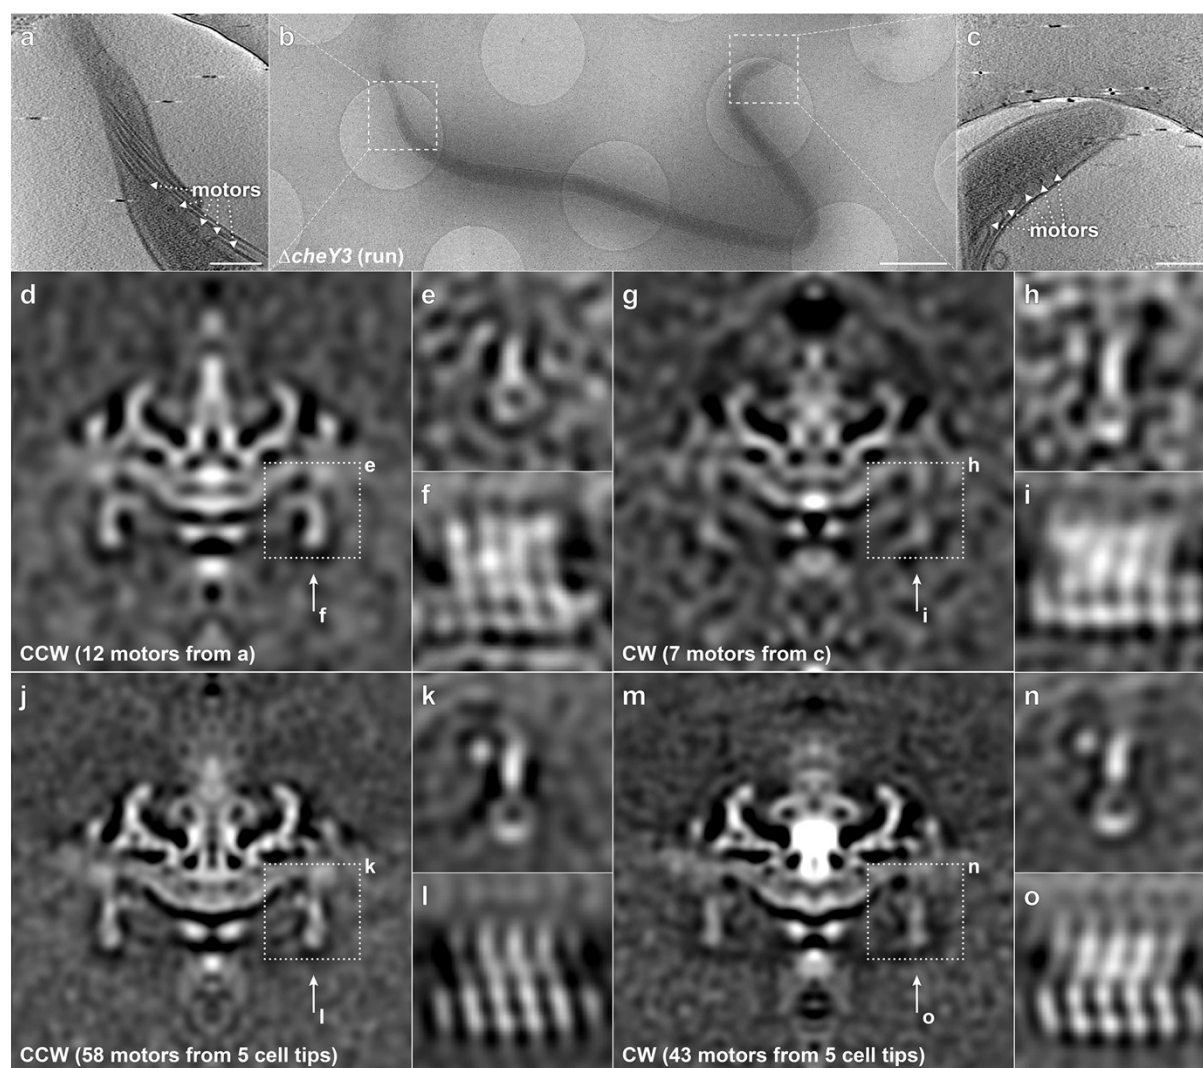

689

690

691 **Extended Data Fig. 8. Motors adopt distinct conformations at the two cell poles in the**

692 **same  $\Delta cheY3$  cell. (a)** A tomographic section from one cell tip showed in panel **b**. **(b)** An

693 overview of one intact  $\Delta cheY3$  cell. **(c)** A tomographic section from another tip of the same

694 cell in panel **b**. The motors at each cell tip were aligned separately, then focused refined to the

695 C-ring. **(d-f)** The motors from one cell tip have CCW conformation. **(g-t)** The motors from

696 another tip appear to adopt CW conformation. **(j-l)** Averaged structure from motors located at

697 one tip of five cells shows a better structure with CCW conformation. **(m-o)** Averaged structure

698 from motors located at another tip of five cells shows a better structure with CW conformation.

699 Bar = 200 nm in **(a, c)**. Bar = 1  $\mu\text{m}$  in **(b)**.

700

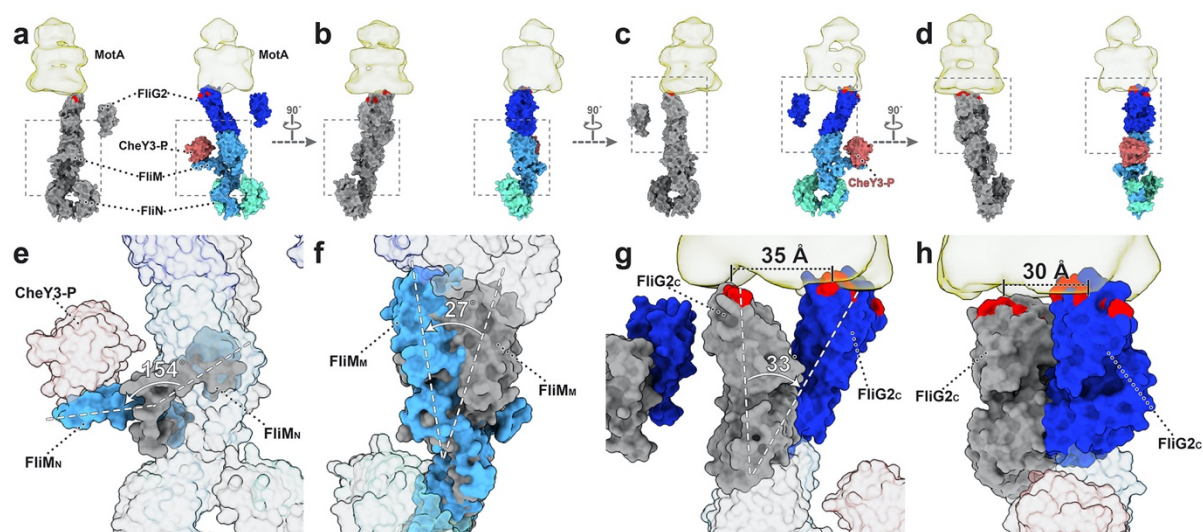

701

702

703 **Extended Data Fig. 9. CheY3-P binding triggers conformational change. (a-d)**

704 Comparison between the C-ring models before (grey, top left in each panel) and after (colored,

705 top right in each panel) CheY3-P binding. (e) The dash framed regions in panel a are

706 overlapped to show their differences. The N-terminal domain of FliM (FliM<sub>N</sub>) folds out ~154°

707 to interact with CheY3-P. (f) Binding of CheY3-P induces ~27° tilt of the FliM middle domain

708 (FliM<sub>M</sub>). (g, h) FliG2 undergoes a large tilt and alters the interactions between FliG2 and MotA.

709 The charged residues (Lys275, Arg292, Glu299, and Asp300) in the C-terminal domain of

710 FliG2 (FliG2<sub>C</sub>) are colored in red.

711

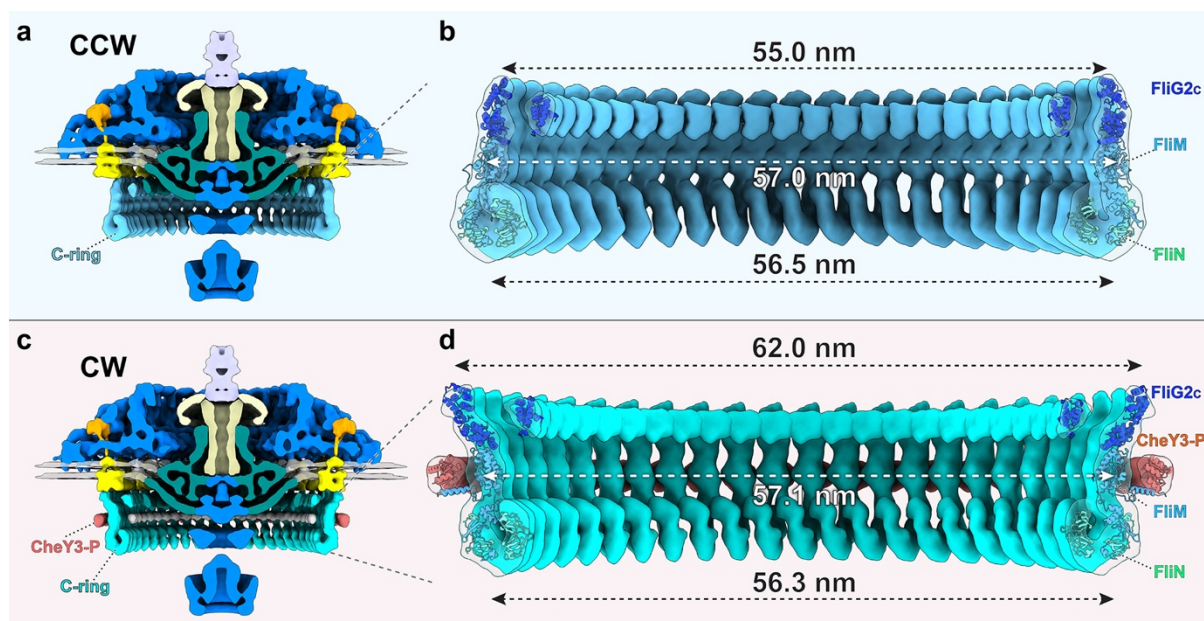

712

713

714 **Extended Data Fig. 10. Comparison of the C-ring structures in CCW and CW rotation.**

715 **(a, b)** Diameters of the FliG<sub>2c</sub>, FliM and FliN rings in the C-ring with CCW rotation ( $\Delta cheY3$ -

716 class-2). **(c-d)** Diameters of the FliG<sub>2</sub>, FliM and FliN rings in the C-ring with CW rotation

717 ( $\Delta cheX$ ).

718

719

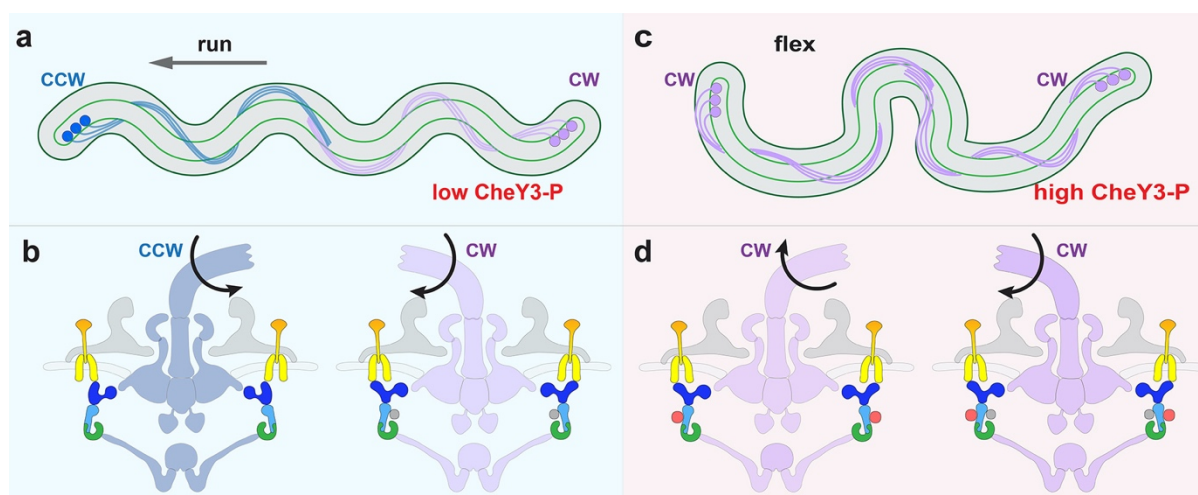

720

721

722 **Extended Data Fig. 11. Motility model for *B. burgdorferi*.** (a, b) In the default state, the  
723 concentration of CheY3-P is low, and the cell runs. The motors at the anterior cell pole rotate  
724 CCW, and the motors at the posterior cell pole rotate CW. Binding of unidentified proteins  
725 (grey circles at the inner side of the C-ring) to the C-ring at the posterior cell pole likely changes  
726 the motor to a CW conformation. (c, d) At high concentrations of CheY3-P, the CCW rotating  
727 motors switch to CW rotation, while the CW rotating motors keep turning CW. Thus, the  
728 motors at both cell poles rotate CW and the cell flexes. After the flex, the direction of flagellar  
729 rotation at the two poles can switch so that the cell reverses the direction of its run.

730

731

732 **Extended Data Table 1. Strains and cryoET data used for this study.**

| Reference                                           | $\Delta cheX$<br>40 | $\Delta cheY3$<br>65             | <i>cheX::cheY3-GFP</i><br>This work |
|-----------------------------------------------------|---------------------|----------------------------------|-------------------------------------|
| Motility phenotype                                  | Constantly flexing  | Constantly running               | Constantly flexing                  |
| Pixel size (Å)                                      | 2.747               | 2.747                            | 2.245                               |
| Defocus (µm)                                        | 2 to 4              | 2 to 4                           | 2 to 4                              |
| Number of tomograms                                 | 246                 | 301                              | 188                                 |
| Number of motors                                    | 1,065               | Class1: 939<br>Class2: 1,148     | 1250                                |
| Number of subtomograms for stator-rotor refinement  | 12,925              | Class1: 14,066<br>Class2: 13,240 | 9,540                               |
| Resolution of refined stator-rotor region (FSC=0.5) | ~18 Å               | Class1: ~19 Å<br>Class2: ~18 Å   | --                                  |

733

734 **Extended Data Table 2. Oligonucleotide primers used in this study.**

| Primer | Sequence (5'-3')                                                     | Note                                               |
|--------|----------------------------------------------------------------------|----------------------------------------------------|
| P1     | CTCTAAACAATACTGCAGCT                                                 | deletion of <i>cheXY</i> , upstream, F             |
| P2     | CTTCCTTGAAGCTCGGGTATAATTTCTCCTTAGACTTTC                              | deletion of <i>cheXY</i> , upstream, R             |
| P3     | TACCCGAGCTTCAAGGAAG                                                  | <i>flgB</i> promoter, deletion of <i>cheXY</i> , F |
| P4     | ATTGTAGTCTTTTGAATCATATTGAAACCTCCCTCATT                               | <i>flgB</i> promoter, deletion of <i>cheXY</i> , R |
| P5     | ATGATTCAAAAGACTACAAT                                                 | <i>cheY3</i> , deletion of <i>cheXY</i> , F        |
| P6     | AGTTCTTCTCCTTTACTCATTTTAACAATAACAGACATTAC                            | <i>gfp</i> , deletion of <i>cheXY</i> , R          |
| P7     | ATGAGTAAAGGAGAAGAAGT                                                 | <i>str</i> , deletion of <i>cheXY</i> , F          |
| P8     | GCGATCACCGCTTCCCTCATTTATTTGTATAGTTCATCCATG                           | <i>str</i> , deletion of <i>cheXY</i> , R          |
| P9     | ATGAGGGAAGCGGTGATCGC                                                 | deletion of <i>cheXY</i> , downstream, F           |
| P10    | TTATTTGCCGACTACCTTGGTGATC                                            | deletion of <i>cheXY</i> , downstream, R           |
| P11    | GATCACCAAGGTAGTCGGCAAATAAATTATTTATAAAAAAAGTTCAAGC                    | deletion of <i>cheXY</i> , downstream, F           |
| P12    | AGTCCCAGTGAATATAGAGT                                                 | deletion of <i>cheXY</i> , downstream, R           |
| P13    | CCTAATATTGATATTGTCACTCTTGcTATTACTATGCCCAAAATGGATGG                   | <i>cheY3</i> site-directed mutagenesis, F          |
| P14    | CCATCCATTTTGGGCATAGTAATAGCAAGAGTGACAATATCAATATTAGG                   | <i>cheY3</i> site-directed mutagenesis, R          |
| P15    | <u>GGATCC</u> ATGATTCAAAAGACTACAATTG                                 | CheY3, recombinant, F                              |
| P16    | <u>GAGCTC</u> TTATTTAACAATAACAGACATT                                 | CheY3, recombinant, R                              |
| P17    | <u>GAGCTC</u> ATGGCAAACAATCCAGGAGC                                   | FliM, recombinant, F                               |
| P18    | <u>GTCGACT</u> ATTACTTGTGTCATCGTCCTTGTAGTC<br>TTCAACCTTCTGTAAGCT     | FliM, recombinant, R                               |
| P19    | <u>GAGCTC</u> ATGAGTGTAGATGAAAAAAG                                   | FliN, recombinant, F                               |
| P20    | <u>GTCGACT</u> ATTACTTGTGTCATCGTCCTTGTAGTC<br>TTCATTTTGTAGTTTAATTATC | FliN, recombinant, R                               |

735 \*F: forward; R, reverse. Underlined sequences are engineered restriction cut sites.

736



737 **Supplementary Video 1.  $\Delta cheX$  cells flex in the video.**

738

739 **Supplementary Video 2. A refined structure of the motor in the  $\Delta cheX$  mutant.**

740

741 **Supplementary Video 3.  $\Delta cheY3$  cells constantly run in the video.**

742

743 **Supplementary Video 4. A class average of the motor in the  $\Delta cheY3$  mutant.**

744

745 **Supplementary Video 5. Another class average of the motor in the  $\Delta cheY3$  mutant.**

746

747 **Supplementary Video 5. Animation showing flagellar rotational switching in the Lyme**  
748 **disease spirochete.**

749

750

751 **Methods and Supplementary References**

752 38 Li, C. *et al.* Asymmetrical flagellar rotation in *Borrelia burgdorferi* nonchemotactic  
753 mutants. *Proc Natl Acad Sci U S A* **99**, 6169-6174, doi:10.1073/pnas.092010499 (2002).

754 39 Sze, C. W. *et al.* Study of the Response Regulator Rrp1 Reveals Its Regulatory Role in  
755 Chitobiose Utilization and Virulence of *Borrelia burgdorferi*. *Infect Immun* **81**, 1775-  
756 1787, doi:10.1128/iai.00050-13 (2013).

757 40 Motaleb, M. A. *et al.* CheX is a phosphorylated CheY phosphatase essential for  
758 *Borrelia burgdorferi* chemotaxis. *J Bacteriol* **187**, 7963-7969,  
759 doi:10.1128/JB.187.23.7963-7969.2005 (2005).

760 41 Motaleb, M. A., Pitzer, J. E., Sultan, S. Z. & Liu, J. A novel gene inactivation system  
761 reveals altered periplasmic flagellar orientation in a *Borrelia burgdorferi* fliL mutant.  
762 *J Bacteriol* **193**, 3324-3331, doi:10.1128/JB.00202-11 (2011).

763 42 Mastronarde, D. N. Automated electron microscope tomography using robust  
764 prediction of specimen movements. *J Struct Biol* **152**, 36-51,  
765 doi:https://doi.org/10.1016/j.jsb.2005.07.007 (2005).

766 43 Eisenstein, F., Danev, R. & Pilhofer, M. Improved applicability and robustness of fast  
767 cryo-electron tomography data acquisition. *J Struct Biol* **208**, 107-114,  
768 doi:https://doi.org/10.1016/j.jsb.2019.08.006 (2019).

769 44 Zheng, S. Q. *et al.* MotionCor2: anisotropic correction of beam-induced motion for  
770 improved cryo-electron microscopy. *Nat Methods* **14**, 331, doi:10.1038/nmeth.4193  
771 (2017).

772 45 Kremer, J. R., Mastronarde, D. N. & McIntosh, J. R. Computer Visualization of Three-  
773 Dimensional Image Data Using IMOD. *J Struct Biol* **116**, 71-76, doi:  
774 10.1006/jsbi.1996.0013 (1996).

775 46 Zhang, K. Gctf: Real-time CTF determination and correction. *J Struct Biol* **193**, 1-12,  
776 doi:10.1016/j.jsb.2015.11.003 (2016).

- 777 47 Zhu, S., Qin, Z., Wang, J., Morado, D. R. & Liu, J. In Situ Structural Analysis of the  
778 Spirochetal Flagellar Motor by Cryo-Electron Tomography. *Methods Mol Biol* **1593**,  
779 229-242, doi:10.1007/978-1-4939-6927-2\_18 (2017).
- 780 48 Winkler, H. 3D reconstruction and processing of volumetric data in cryo-electron  
781 tomography. *J Struct Biol* **157**, 126-137, doi: 10.1016/j.jsb.2006.07.014 (2007).
- 782 49 Winkler, H. *et al.* Tomographic subvolume alignment and subvolume classification  
783 applied to myosin V and SIV envelope spikes. *J Struct Biol* **165**, 64-77, doi:  
784 10.1016/j.jsb.2008.10.004 (2009).
- 785 50 Liu, J., Wright, E. R. & Winkler, H. in *Methods in Enzymology* Vol. 483 (ed Grant J.  
786 Jensen) 267-290 (Academic Press, 2010).
- 787 51 Vartanian, A. S., Paz, A., Fortgang, E. A., Abramson, J. & Dahlquist, F. W. Structure  
788 of Flagellar Motor Proteins in Complex Allows for Insights into Motor Structure and  
789 Switching. *J Biol Chem* **287**, 35779-35783, doi:10.1074/jbc.C112.378380 (2012).
- 790 52 Lee, L. K., Ginsburg, M. A., Crovace, C., Donohoe, M. & Stock, D. Structure of the  
791 torque ring of the flagellar motor and the molecular basis for rotational switching.  
792 *Nature* **466**, 996, doi:10.1038/nature09300 (2010).
- 793 53 Notti, R. Q., Bhattacharya, S., Lilic, M. & Stebbins, C. E. A common assembly module  
794 in injectisome and flagellar type III secretion sorting platforms. *Nat Commun* **6**, 7125  
795 (2015).
- 796 54 Brown, P. N., Mathews, M. A. A., Joss, L. A., Hill, C. P. & Blair, D. F. Crystal Structure  
797 of the Flagellar Rotor Protein FliN from *Thermotoga maritima*. *J Bacteriol* **187**, 2890,  
798 doi:10.1128/JB.187.8.2890-2902.2005 (2005).
- 799 55 Ahn, D.-R., Song, H., Kim, J., Lee, S. & Park, S. The crystal structure of an activated  
800 *Thermotoga maritima* CheY with N-terminal region of FliM. *Int J Biol Macromol* **54**,  
801 76-83, doi:https://doi.org/10.1016/j.ijbiomac.2012.12.003 (2013).
- 802 56 Roy, A., Kucukural, A. & Zhang, Y. I-TASSER: a unified platform for automated  
803 protein structure and function prediction. *Nat Protoc* **5**, 725-738,  
804 doi:10.1038/nprot.2010.5 (2010).
- 805 57 Yang, J. *et al.* The I-TASSER Suite: protein structure and function prediction. *Nat*  
806 *Methods* **12**, 7-8, doi:10.1038/nmeth.3213 (2015).
- 807 58 Yang, J. & Zhang, Y. I-TASSER server: new development for protein structure and  
808 function predictions. *Nucleic Acids Res* **43**, W174-181, doi:10.1093/nar/gkv342 (2015).
- 809 59 Pettersen, E. F. *et al.* UCSF Chimera—A visualization system for exploratory research  
810 and analysis. *J Comp Chem* **25**, 1605-1612, doi:doi:10.1002/jcc.20084 (2004).
- 811 60 Lyskov, S. & Gray, J. J. The RosettaDock server for local protein-protein docking.  
812 *Nucleic Acids Res* **36**, W233-238, doi:10.1093/nar/gkn216 (2008).

- 813 61 Afonine, P. V., Grosse-Kunstleve, R. W., Adams, P. D. & Urzhumtsev, A. Bulk-solvent  
814 and overall scaling revisited: faster calculations, improved results. *Acta Crystallogr D*  
815 *Biol Crystallogr* **69**, 625-634, doi:10.1107/S0907444913000462 (2013).
- 816 62 Kojima, S. *et al.* Stator assembly and activation mechanism of the flagellar motor by  
817 the periplasmic region of MotB. *Mol Microbiol* **73**, 710-718 (2009).
- 818 63 Takekawa, N. *et al.* The tetrameric MotA complex as the core of the flagellar motor  
819 stator from hyperthermophilic bacterium. *Sci Rep* **6**, 31526, doi:10.1038/srep31526  
820 (2016).
- 821 64 Goddard, T. D. *et al.* UCSF ChimeraX: Meeting modern challenges in visualization  
822 and analysis. *Prot Sci* **27**, 14-25, doi:doi:10.1002/pro.3235 (2018).
- 823 65 Motaleb, M. A., Sultan, S. Z., Miller, M. R., Li, C. & Charon, N. W. CheY3 of *Borrelia*  
824 *burgdorferi* is the key response regulator essential for chemotaxis and forms a long-  
825 lived phosphorylated intermediate. *J Bacteriol* **193**, 3332-3341, doi:10.1128/JB.00362-  
826 11 (2011).
- 827
